# Supplementary material for: Bi(OTf)3-catalysed synthesis of substituted indanes by a double hydroarylation of unactivated 1,3-dienes
Source: Royal Society of Chemistry journal article supplement (doi:10.1039/c4qo00149d), 2014-01-01

Supporting Information for:

## Bi(OTf)<sub>3</sub>-Catalysed Synthesis of Substituted Indanes by a Double Hydroarylation of Unactivated 1,3-Dienes

Bastien Cacciuttolo, Pierrick Ondet, Sophie Poulain-Martini, Gilles Lemière and Elisabet Duñach\*

### General remarks:

Reactions were carried out under an anhydrous atmosphere of Nitrogen. Glassware was oven-dried prior to use. Anhydrous Anhydrous MeNO<sub>2</sub> was obtained by drying over CaCl<sub>2</sub>. Other commercially available reagents were used as received unless stated otherwise. Column chromatography was carried out on silica gel (spherical, neutral, 63-200 µm, Geduran Si 60, Merck KGaA). GC/MS analyses were performed with a Shimadzu QP2010S-MS chromatograph (EI, 70 eV) equipped with a SLB-5ms capillary column (thickness: 0.25 mm, length: 30 m, inside diameter: 0.25 mm). Analytical thin-layer chromatography (TLC) was performed on 0.2 mm precoated plate Kieselgel 60 F254 (Merck). NMR spectra (<sup>1</sup>H, <sup>13</sup>C, DEPT, COSY <sup>1</sup>H-<sup>1</sup>H and <sup>1</sup>H-<sup>13</sup>C, nOe) were recorded on a BRUKER AC 200 spectrometer. <sup>1</sup>H NMR spectra are referenced at 7.26 ppm for CDCl<sub>3</sub>. <sup>13</sup>C NMR spectra are referenced at 77.00 ppm for CDCl<sub>3</sub>. Chemical shifts are given in ppm.

High resolution mass spectroscopy (HRMS) were performed on a LTQ/Orbitrap Thermo Fisher.

### 1-methoxy-4-(3-methylbut-2-enyl)benzene *p*-3a and 1-methoxy-2-(3-methylbut-2-enyl)benzene *o*-3a

Bi(OTf)<sub>3</sub> (7 mg, 0.01 mmol) was added to a mixture of anisole **1a** (2.2 mL, 20 mmol) and isoprene **2a** (320 µL, 2 mmol). The solution was stirred at room temperature for 1h. After complete consumption of the diene (GC monitoring), the reaction mixture was quenched with a saturated aqueous solution of NaHCO<sub>3</sub>, extracted thrice with diethyl ether, washed with a saturated aqueous solution of NaCl, dried over anhydrous MgSO<sub>4</sub> and concentrated under reduced pressure. The residue was purified by column chromatography (pentane) to afford the *o*-**3a** (63 mg), *o*-**3a** and *p*-**3a** (204 mg, *o*:*p* = 25:75) and *p*-**3a** (63 mg) as colorless oil (overall yield: 94%).

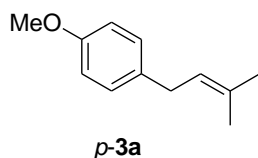

Chemical Formula: C<sub>12</sub>H<sub>16</sub>O  
Molecular Weight: 176,25

<sup>1</sup>H NMR (200 MHz, CDCl<sub>3</sub>) 7.17-7.08 (m, 2H), 6.90-6.80 (m, 2H), 5.33 (bt, *J* = 7.3 Hz, 1H), 3.80 (s, 3H), 3.31 (d, *J* = 7.4 Hz, 2H), 1.77 (bs, 3H), 1.74 (bs, 3H).

<sup>13</sup>C NMR (50 MHz, CDCl<sub>3</sub>) 158.1, 133.9, 132.1, 129.2, 123.6, 113.8, 55.3, 33.4, 25.8, 17.7.

MS (*m/z*) 176(52) [M<sup>+</sup>], 161(100), 146(17), 121(38), 115(25), 108 (16), 91(95), 77(72), 65(50), 51 (44).

Spectral data were in accordance with those reported in literature<sup>1</sup>

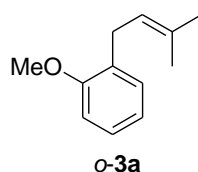

Chemical Formula: C<sub>12</sub>H<sub>16</sub>O  
Molecular Weight: 176,25

<sup>1</sup>H NMR (200 MHz, CDCl<sub>3</sub>) 7.25-7.09 (m, 2H), 6.98-6.78 (m, 2H), 5.33 (bt, *J* = 7.3 Hz, 1H), 3.85 (s, 3H), 3.34 (d, *J* = 7.4 Hz, 2H), 1.76 (bs, 3H), 1.73 (bs, 3H).

<sup>13</sup>C NMR (50 MHz, CDCl<sub>3</sub>) 157.7, 133.9, 131.4, 129.0, 127.7, 123.5, 120.3, 110.1, 55.3, 33.3, 25.6, 17.6.

MS (*m/z*) 176(22) [M<sup>+</sup>], 161 (27), 121 (17), 107(10), 91 (100), 77 (39), 65 (35).

Spectral data were in accordance with those reported in literature<sup>2</sup>

<sup>1</sup> Y. Yang and S. L. Buchwald, *J. Am. Chem. Soc.*, 2013, **135**, 10642-10645.

## General procedure for the formation of indanes from 1,3-dienes:

To a solution of 1,2-dimethoxybenzene **1b** (127  $\mu$ L, 1.0 mmol) and Bi(OTf)<sub>3</sub> (33 mg, 0.05 mmol) in nitromethane (1 mL) was slowly added isoprene **2a** (150  $\mu$ L, 1.5 mmol) in nitromethane (1 mL) over 1 hour at room temperature using a syringe pump. After the addition, the solution was stirred for 1h. After complete consumption of the aromatic compound (GC monitoring), the reaction mixture was quenched with a saturated aqueous solution of NaHCO<sub>3</sub>, extracted thrice with diethyl ether, washed with a saturated aqueous solution of NaCl, dried over anhydrous MgSO<sub>4</sub> and concentrated under reduced pressure. The residue was purified by column chromatography (pentane/Et<sub>2</sub>O: 100/0 to 90/10) to afford the indane compound **4a** (163 mg, 79 %) as a colorless oil.

### 5,6-dimethoxy-1,1-dimethyl-2,3-dihydro-1H-indene 4a

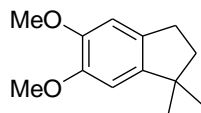

Chemical Formula: C<sub>13</sub>H<sub>18</sub>O<sub>2</sub>  
Molecular Weight: 206,28

Indane **4a** was obtained as a colorless oil (163 mg, 79%) following the General Procedure from 1,2-dimethoxybenzene **1b** (127  $\mu$ L, 1.0 mmol), isoprene **2a** (150  $\mu$ L, 1.5 mmol) and Bi(OTf)<sub>3</sub> (33 mg, 0.05 mmol).

**<sup>1</sup>H NMR** (200 MHz, CDCl<sub>3</sub>) 6.75 (s, 1H), 6.68 (s, 1H), 3.89 (s, 3H), 3.86 (s, 3H), 2.84 (t, J = 7.0 Hz, 2H), 1.93 (t, J = 7.0 Hz, 2H), 1.25 (s, 6H)

**<sup>13</sup>C NMR** (50 MHz, CDCl<sub>3</sub>) 148.0, 147.8, 144.2, 134.0, 107.7, 105.4, 56.0, 55.9, 44.0, 29.8, 28.6 (2C)

**MS** (*m/z*) 206 (21) [M<sup>+</sup>], 192 (15), 191 (100), 161 (8), 160 (27), 115 (12), 103 (9), 91 (12), 77 (14), 51 (8)

**HRMS** (ESI<sup>+</sup>) Calculated for [C<sub>13</sub>H<sub>18</sub>O<sub>2</sub>]<sup>+</sup>: 207.1380; Found: 207.1377.

Spectral data were in accordance with those reported in literature<sup>3</sup>

### 5,6-dimethoxy-1,1,2-trimethyl-2,3-dihydro-1H-indene 4b

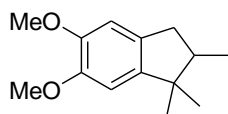

Chemical Formula: C<sub>14</sub>H<sub>20</sub>O<sub>2</sub>  
Molecular Weight: 220,31

Indane **4b** was obtained as a colorless oil (209 mg, 95%) following the General Procedure from 1,2-dimethoxybenzene **1b** (127  $\mu$ L, 1.0 mmol), 2,3-dimethyl-1,3-butadiene **2b** (170  $\mu$ L, 1.5 mmol) and Bi(OTf)<sub>3</sub> (33 mg, 0.05 mmol).

**<sup>1</sup>H NMR** (200 MHz, CDCl<sub>3</sub>) 6.73 (s, 1H), 6.67 (s, 1H), 3.88 (s, 3H), 3.85 (s, 3H), 2.86 (dd, <sup>3</sup>J = 7.5 Hz, <sup>2</sup>J = 15.1 Hz, 1H), 2.48 (dd, <sup>3</sup>J = 7.5 Hz, <sup>2</sup>J = 15.1 Hz, 1H), 2.13 (m, 1H), 1.25 (s, 3H), 1.04 (d, 3J = 7.0 Hz, 3H), 0.94 (s, 3H)

**<sup>13</sup>C NMR** (50 MHz, CDCl<sub>3</sub>) 148.0, 147.7, 145.1, 133.2, 107.7, 105.8, 56.1, 56.0, 45.9, 45.4, 38.3, 26.8, 23.1, 14.0

**MS** (*m/z*) 220 (25) [M<sup>+</sup>], 206 (19), 205 (100), 145 (14), 105 (14), 81 (18), 57 (69), 55 (13), 44 (17), 41 (35)

**HRMS** (ESI<sup>+</sup>) Calculated for [C<sub>14</sub>H<sub>21</sub>O<sub>2</sub>]<sup>+</sup>: 221.1536; Found: 221.1535.

### 3-isopropyl-5,6-dimethoxy-1,1-dimethyl-2,3-dihydro-1H-indene 4c

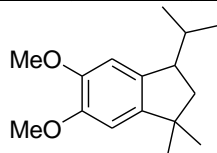

Chemical Formula: C<sub>16</sub>H<sub>24</sub>O<sub>2</sub>  
Molecular Weight: 248,36

Indane **4c** was obtained as a colorless oil (176 mg, 71%) following the General Procedure from 1,2-dimethoxybenzene **1b** (127  $\mu$ L, 1.0 mmol), 2,5-dimethyl-2,4-hexadiene **2c** (213  $\mu$ L, 1.5 mmol) and Bi(OTf)<sub>3</sub> (33 mg, 0.05 mmol).

**<sup>1</sup>H NMR** (200 MHz, CDCl<sub>3</sub>) 6.67 (s, 1H), 6.64 (s, 1H), 3.88 (s, 3H), 3.86 (s, 3H), 3.16 (m, 1H), 2.21 (m, 1H), 1.87 (m, 1H), 1.65 (m, 1H), 1.32 (s, 3H), 1.15 (s, 3H), 1.03 (d, J = 7 Hz, 3H), 0.75 (d, J = 7 Hz, 3H)

<sup>2</sup> J. L. Farmer, H. N. Hunter and M. G. Organ, *J. Am. Chem. Soc.*, 2012, **134**, 17470-17473.

<sup>3</sup> H. Lebel, C. Ladjel and L. Br  thous, *J. Am. Chem. Soc.*, 2007, **129**, 13321-13326.

**$^{13}\text{C}$  NMR** (50 MHz,  $\text{CDCl}_3$ ) 184.1, 147.9, 144.8, 136.3, 107.0, 105.2, 56.0, 55.9, 47.8, 42.3, 42.1, 29.9, 29.2, 21.4, 17.0

**MS** ( $m/z$ ) 248 (14) [ $\text{M}^+$ ], 233 (7), 206 (14), 205 (100), 190 (7), 175 (7), 174 (20), 115 (6), 91 (7), 41 (7)

**HRMS** ( $\text{ESI}^+$ ) Calculated for  $[\text{C}_{16}\text{H}_{25}\text{O}_2]^+$ : 249.1849; Found: 249.1847.

#### **5,5-dimethyl-6,7-dihydro-5H-indeno[5,6-d][1,3]dioxole 4d**

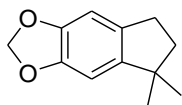

Chemical Formula:  $\text{C}_{12}\text{H}_{14}\text{O}_2$   
Molecular Weight: 190,24

Indane **4d** was obtained as a colorless oil (173 mg, 91%) following the General Procedure from 1,3-benzodioxole **1c** (115  $\mu\text{L}$ , 1.0 mmol), isoprene **2a** (150  $\mu\text{L}$ , 1.5 mmol) and  $\text{Bi}(\text{OTf})_3$  (33 mg, 0.05 mmol).

**$^1\text{H}$  NMR** (200 MHz,  $\text{CDCl}_3$ ) 6.65 (s, 1H), 6.61 (s, 1H), 5.90 (s, 2H), 2.78 (t,  $J = 7$  Hz, 2H), 1.92 (t,  $J = 7$  Hz, 2H), 1.21 (s, 3H)

**$^{13}\text{C}$  NMR** (50 MHz,  $\text{CDCl}_3$ ) 146.4, 146.2, 145.6, 135.2, 105.0, 102.8, 100.8, 43.7, 41.8, 30.0, 28.7 (2C)

**MS** ( $m/z$ ) 190 (26) [ $\text{M}^+$ ], 176 (10), 175 (100), 146 (7), 145 (50), 117 (30), 115 (23), 91 (12), 77 (8), 51 (12)

Spectral data were in accordance with those reported in literature<sup>4</sup>

#### **3-isopropyl-6-methoxy-1,1-dimethyl-2,3-dihydro-1H-indene 4e**

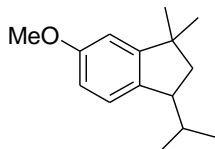

Chemical Formula:  $\text{C}_{15}\text{H}_{22}\text{O}$   
Molecular Weight: 218,33

Indane **4e** was obtained as a colorless oil (172 mg, 79%) following the General Procedure from anisole **1a** (109  $\mu\text{L}$ , 1.0 mmol), 2,5-dimethyl-2,4-hexadiene **2c** (213  $\mu\text{L}$ , 1.5 mmol) and  $\text{Bi}(\text{OTf})_3$  (33 mg, 0.05 mmol). ) The temperature was increased to reflux after total consumption of the diene.

**$^1\text{H}$  NMR** (200 MHz,  $\text{CDCl}_3$ ) 7.04 – 6.66 (m, 3H), 3.80 (s, 3H), 3.14 (m, 1H), 2.16 (m, 1H), 1.24 (m, 1H), 1.71 (m, 1H), 1.33 (s, 3H), 1.16 (s, 3H), 1.04 (d,  $J = 7$  Hz, 3H), 0.74 (d,  $J = 7$  Hz, 3H)

**$^{13}\text{C}$  NMR** (50 MHz,  $\text{CDCl}_3$ ) 158.8, 154.6, 137.0, 124.36, 111.7, 107.6, 53.3, 47.3, 42.6, 42.35, 29.7, 29.2, 28.8, 21.4, 17.2

**MS** ( $m/z$ ) 218 (7) [ $\text{M}^+$ ], 176 (13), 175 (100), 160 (13), 145 (12), 128 (13), 117 (10), 115 (20), 91 (17), 43 (25), 41 (29)

#### **1-isopropyl-3,3,4,6-tetramethyl-2,3-dihydro-1H-inden-5-ol 4f**

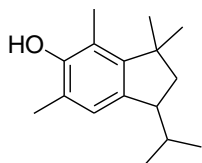

Chemical Formula:  $\text{C}_{16}\text{H}_{24}\text{O}$   
Molecular Weight: 232,36

Indane **4f** was obtained as a colorless oil (216 mg, 93%) following the General Procedure from 2,6-dimethylphenol **1d** (122 mg, 1.0 mmol), 2,5-dimethyl-2,4-hexadiene **2c** (213  $\mu\text{L}$ , 1.5 mmol) and  $\text{Bi}(\text{OTf})_3$  (33 mg, 0.05 mmol). ) The temperature was increased to reflux after total consumption of the diene.

**$^1\text{H}$  NMR** (200 MHz,  $\text{CDCl}_3$ ) 6.75 (s, 1H), 4.52 (s, 1H), 3.03 (m, 1H), 2.26 (s, 3H), 2.22 (s, 3H), 1.75 (m, 3H), 1.44 (s, 3H), 1.24 (s, 3H), 1.01 (d,  $J = 7$  Hz, 3H), 0.75 (d,  $J = 7$  Hz, 3H)

**$^{13}\text{C}$  NMR** (125 MHz,  $\text{CDCl}_3$ ) 150.9, 148.6, 137.2, 123.1, 120.8, 119.1, 46.6, 44.0, 43.5, 29.2, 28.7, 27.1, 21.5, 16.7, 16.4, 11.4

**MS** ( $m/z$ ) 287 (22), 286 (100) [ $\text{M}^+$ ], 271 (53), 232 (23), 231 (89), 215 (78), 201 (24), 44 (27), 43 (28), 41 (42)

**HRMS** ( $\text{ESI}^+$ ) Calculated for  $[\text{C}_{16}\text{H}_{25}\text{O}]^+$ : 233.1900; Found: 233.1899.

<sup>4</sup> S. A. Bonderoff, F. G. West and M. Tremblay, *Tetrahedron Lett.*, 2012, **53**, 4600-4603.

#### **1,4,6-triisopropyl-3,3-dimethyl-2,3-dihydro-1H-inden-5-ol 4g**

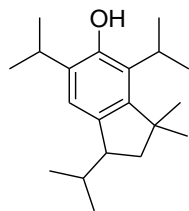

Chemical Formula: C<sub>20</sub>H<sub>32</sub>O  
Molecular Weight: 288,47

Indane **4g** was obtained as a colorless oil (271 mg, 94%) following the General Procedure from 2,6-diisopropylphenol **1e** (185  $\mu$ L, 1.0 mmol), 2,5-dimethyl-2,4-hexadiene **2c** (213  $\mu$ L, 1.5 mmol) and Bi(OTf)<sub>3</sub> (33 mg, 0.05 mmol).

**<sup>1</sup>H NMR** (200 MHz, CDCl<sub>3</sub>) 6.78 (s, 1H), 4.60 (s, 1H), 3.42 (dt, *J* = 14.3, 7.2 Hz, 1H), 3.21 – 2.86 (m, 2H), 2.33 – 2.11 (m, 1H), 1.78 (dd, *J* = 12.4, 7.9 Hz, 2H), 1.48 – 1.31 (m, 10H), 1.25 (dd, *J* = 6.8, 4.0 Hz, 10H), 1.02 (d, *J* = 6.8 Hz, 4H), 0.76 (d, *J* = 6.8 Hz, 3H)

**<sup>13</sup>C NMR** (50 MHz, CDCl<sub>3</sub>) 151.0, 147.3, 137.4, 132.3, 129.7, 118.3, 46.6, 44.5, 43.7, 30.3, 28.8, 28.1, 27.8, 27.0, 23.0, 22.8, 21.5, 20.8, 20.8, 16.8

**MS** (*m/z*) 288 (20) [M<sup>+</sup>], 245 (17), 231 (100), 192 (8), 147 (53), 137 (17), 128 (4), 100 (12), 43 (20), 41 (10)

#### **4,6-diisopropyl-3,3-dimethyl-2,3-dihydro-1H-inden-5-ol 4h**

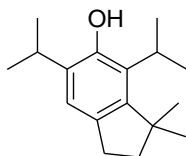

Chemical Formula: C<sub>17</sub>H<sub>26</sub>O  
Molecular Weight: 246,39

Indane **4h** was obtained as a colorless oil (202 mg, 82%) following the General Procedure from 2,6-diisopropylphenol **1e** (185  $\mu$ L, 1.0 mmol), isoprene **2a** (150  $\mu$ L, 1.5 mmol) and Bi(OTf)<sub>3</sub> (33 mg, 0.05 mmol).

**<sup>1</sup>H NMR** (200 MHz, CDCl<sub>3</sub>) 6.86 (s, 1H), 4.61 (s, 1H), 3.56 – 3.32 (m, 1H), 3.02 (m, 1H), 2.73 (t, *J* = 7.4 Hz, 2H), 1.88 (t, *J* = 7.4 Hz, 2H), 1.40 (d, *J* = 7.2 Hz, 6H), 1.36 (s, 6H), 1.25 (d, *J* = 7.2 Hz, 6H)

**<sup>13</sup>C NMR** (50 MHz, CDCl<sub>3</sub>) 151.1, 146.8, 135.2, 132.5, 130.1, 119.1, 45.8, 43.9, 29.3, 28.6 (2C), 27.9, 26.9, 22.8 (2C), 20.8 (2C)

**MS** (*m/z*) 246 (29) [M<sup>+</sup>], 232 (17), 231 (100), 189 (8), 147 (53), 129 (12), 128 (9), 100 (15), 43 (17), 41 (13)

Synthesis of this compound has already been reported<sup>5</sup>

#### **9-isopropyl-2,2,5,6,6,7-hexamethyl-2,3,4,6,7,8-hexahydrocyclopenta[g]chromene 4i**

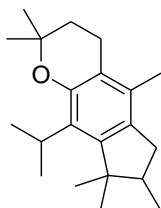

Chemical Formula: C<sub>21</sub>H<sub>32</sub>O  
Molecular Weight: 300,48

Indane **4i** was obtained as a colorless oil (291 mg, 97%) following the General Procedure from the corresponding chromane derivative **1f** (218 mg, 1.0 mmol), 2,3-dimethyl-1,3-butadiene **2b** (170  $\mu$ L, 1.5 mmol) and Bi(OTf)<sub>3</sub> (33 mg, 0.05 mmol). The temperature was increased to reflux after total consumption of the diene.

**<sup>1</sup>H NMR** (200 MHz, CDCl<sub>3</sub>) 3.36 (dt, *J* = 13.9, 7.0 Hz, 1H), 2.84 (dd, *J* = 14.8, 7.7 Hz, 1H), 2.62 (td, *J* = 6.8, 2.3 Hz, 2H), 2.30 (dd, *J* = 14.8, 11.2 Hz, 1H), 2.08 (s, 3H), 2.05 – 1.92 (m, 1H), 1.76 (t, *J* = 6.9 Hz, 2H), 1.42 – 1.29 (m, 15H), 1.03 (d, *J* = 8.1 Hz, 3H), 1.01 (s, 3H)

**<sup>13</sup>C NMR** (50 MHz, CDCl<sub>3</sub>) 135.7, 133.5, 132.0, 131.3, 128.6, 128.0, 127.1, 126.4, 44.5, 33.6, 31.7, 25.9, 20.9, 19.9, 18.2

**MS** (*m/z*) 300 (48) [M<sup>+</sup>], 286 (14), 140 (21), 93 (14), 77 (10), 55 (36), 51 (14), 44 (76), 43 (100), 41 (87)

<sup>5</sup> T. F. Wood and G. H. Goodwin, *GE Patent 1801662*, 1977

### 9-isopropyl-2,2,5,6,6-pentamethyl-2,3,4,6,7,8-hexahydrocyclopenta[*g*]chromene 4j

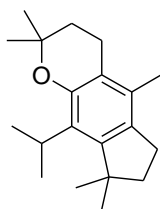

Chemical Formula: C<sub>20</sub>H<sub>30</sub>O  
Molecular Weight: 286,45

To a solution of thymol **1g** (150 mg, 1.0 mmol) and Bi(OTf)<sub>3</sub> (33 mg, 0.05 mmol) in 1,2-dichloroethane (1 mL) was slowly added isoprene **2a** (300  $\mu$ L, 3.0 mmol) in 1,2-dichloroethane (1 mL) over 1 hour at room temperature using a syringe pump. After the addition, the solution was stirred for 1h at 50 °C. After complete consumption of the aromatic compound (GC monitoring), the reaction mixture was quenched with a saturated aqueous solution of NaHCO<sub>3</sub>, extracted thrice with diethyl ether, washed with a saturated aqueous solution of NaCl, dried over anhydrous MgSO<sub>4</sub> and concentrated under reduced pressure. The residue was purified by column chromatography to afford the indane compound **4j** (263 mg, 92 %) as a colorless oil.

**<sup>1</sup>H NMR** (200 MHz, CDCl<sub>3</sub>) 3.32 (dt, *J* = 14.0, 6.9 Hz, 1H), 2.71 (t, *J* = 7.4 Hz, 2H), 2.62 (t, *J* = 6.9 Hz, 2H), 2.08 (s, 2H), 1.93 – 1.81 (m, 2H), 1.80 (s, 2H), 1.33 (m, 15H)

**<sup>13</sup>C NMR** (50 MHz, CDCl<sub>3</sub>) 152.0, 147.7, 131.8, 129.8, 129.0, 117.6, 72.4, 46.9, 45.5, 36.6, 32.8, 28.0, 27.9, 27.1, 26.3, 21.4, 20.9, 20.8, 15.3, 13.6

**MS** (*m/z*) 287 (21), 286 (94) [M<sup>+</sup>], 271 (68), 232 (18), 231 (100), 215 (70), 187 (18), 173 (19), 43 (21), 41 (30)

**HRMS (ESI<sup>+</sup>)** Calculated for [C<sub>13</sub>H<sub>19</sub>O<sub>2</sub>]<sup>+</sup>: 287.2369; Found: 287.2368.

## NMR SPECTRA

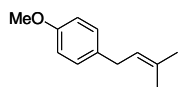

***p*-3a**

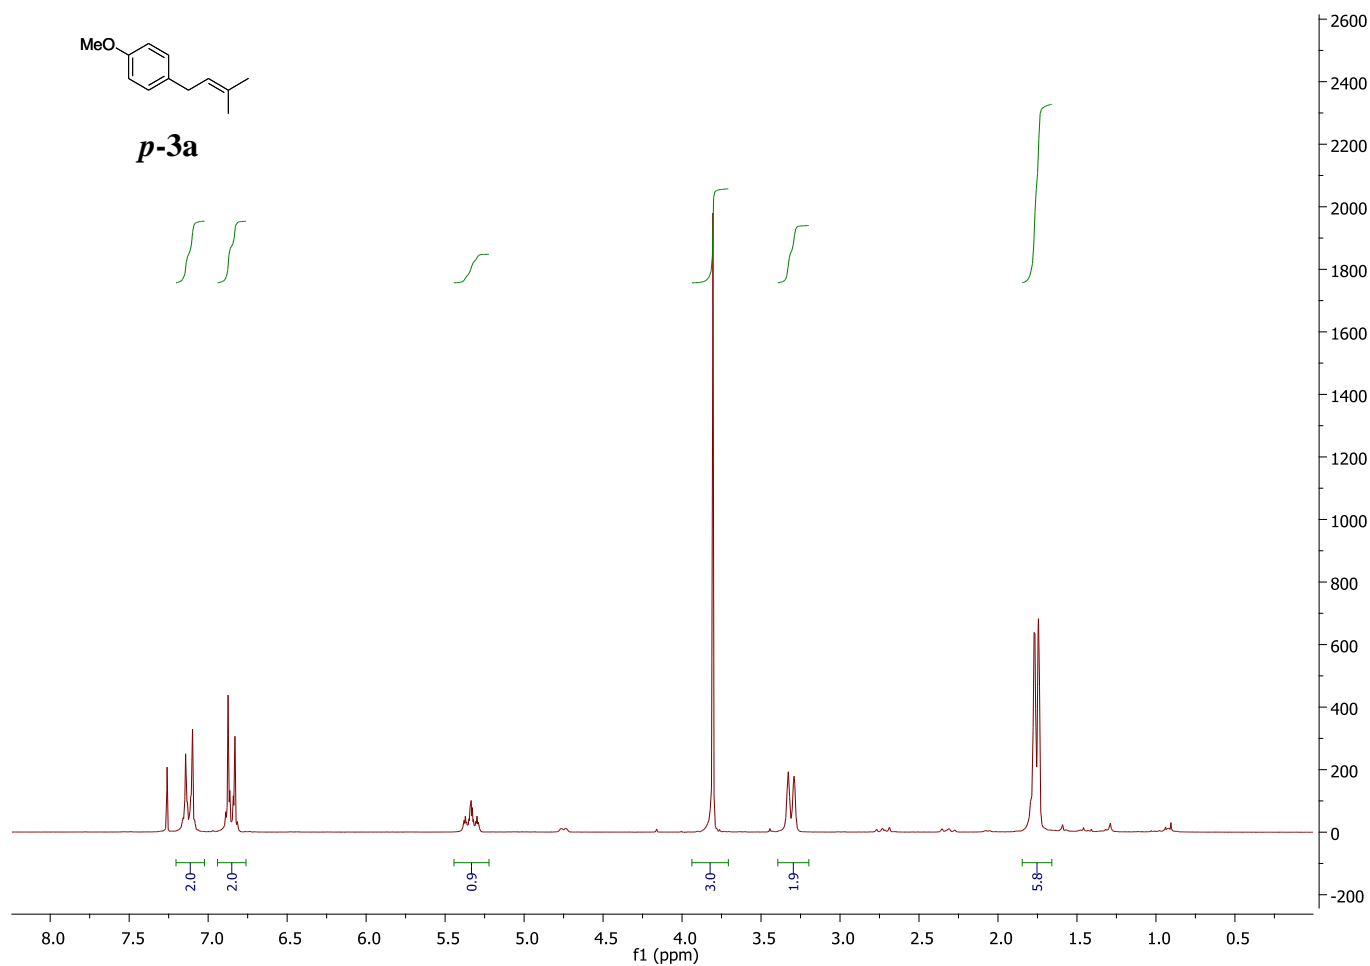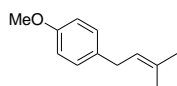

***p*-3a**

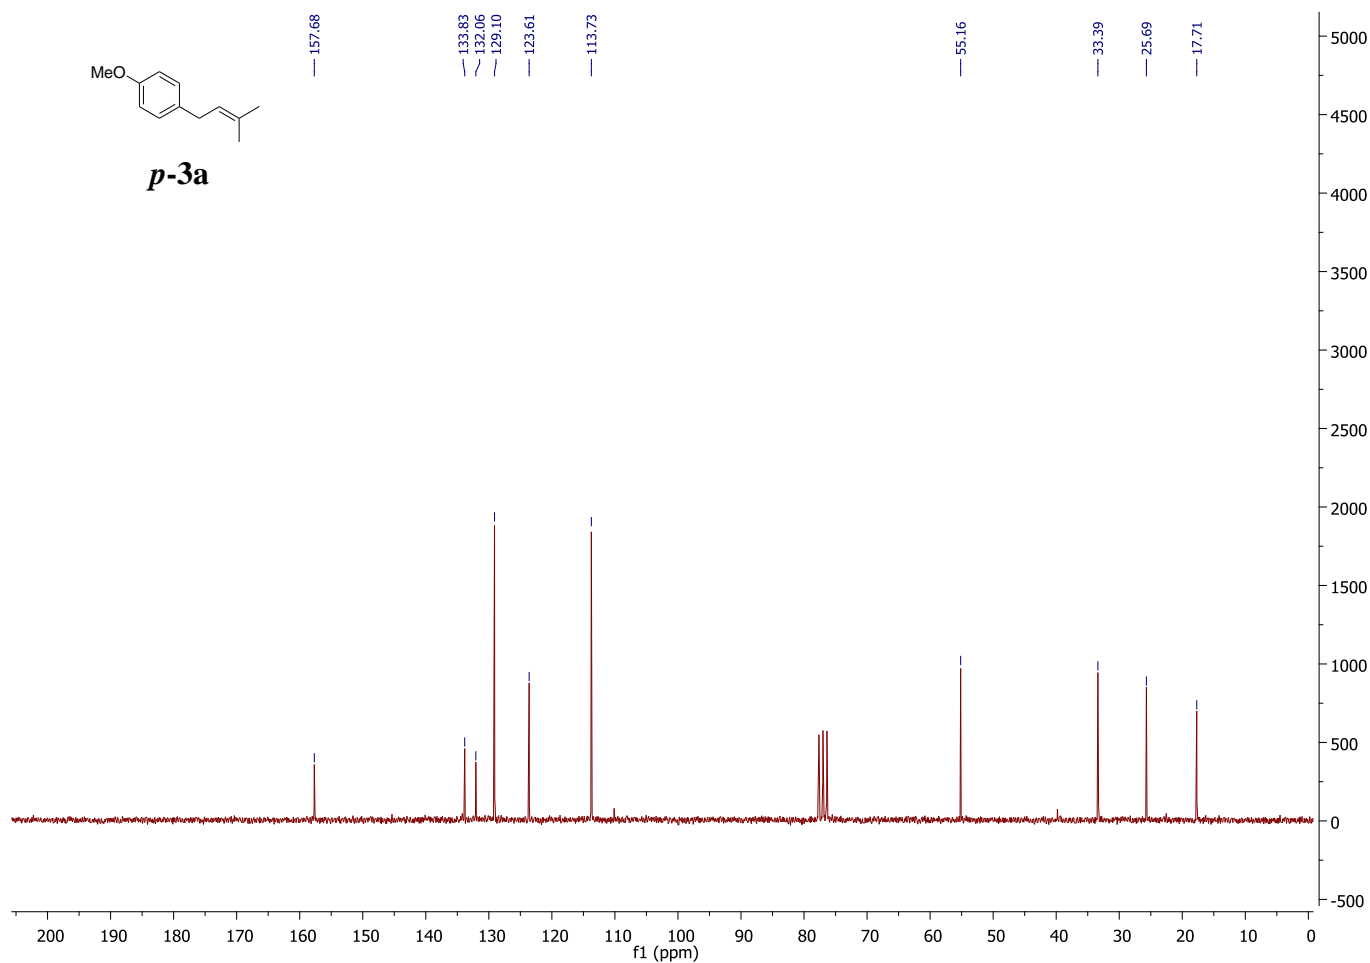

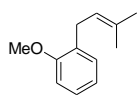

***o*-3a**

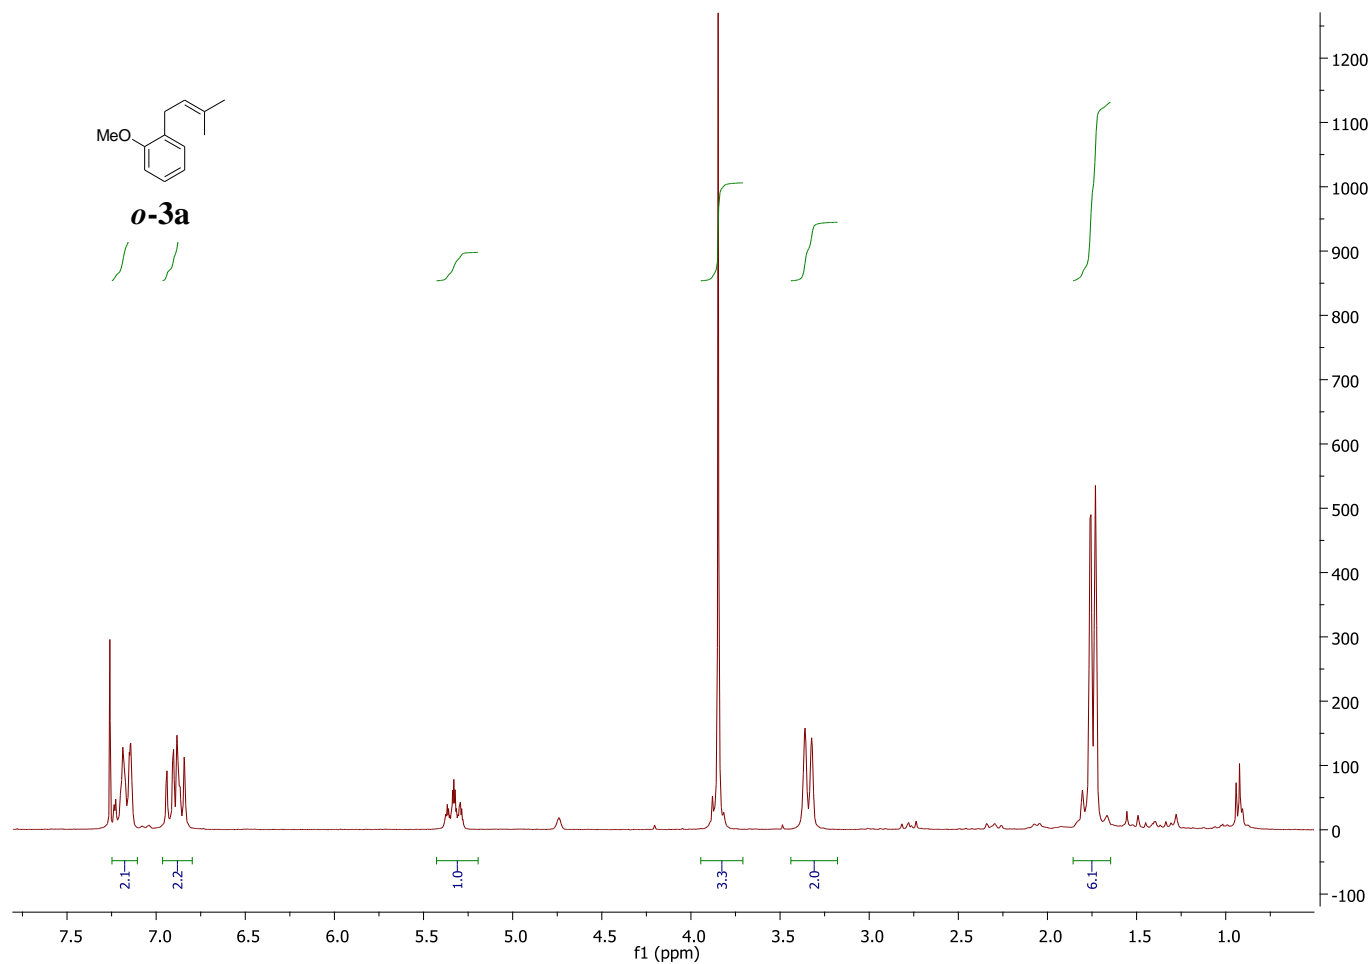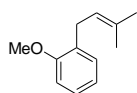

***o*-3a**

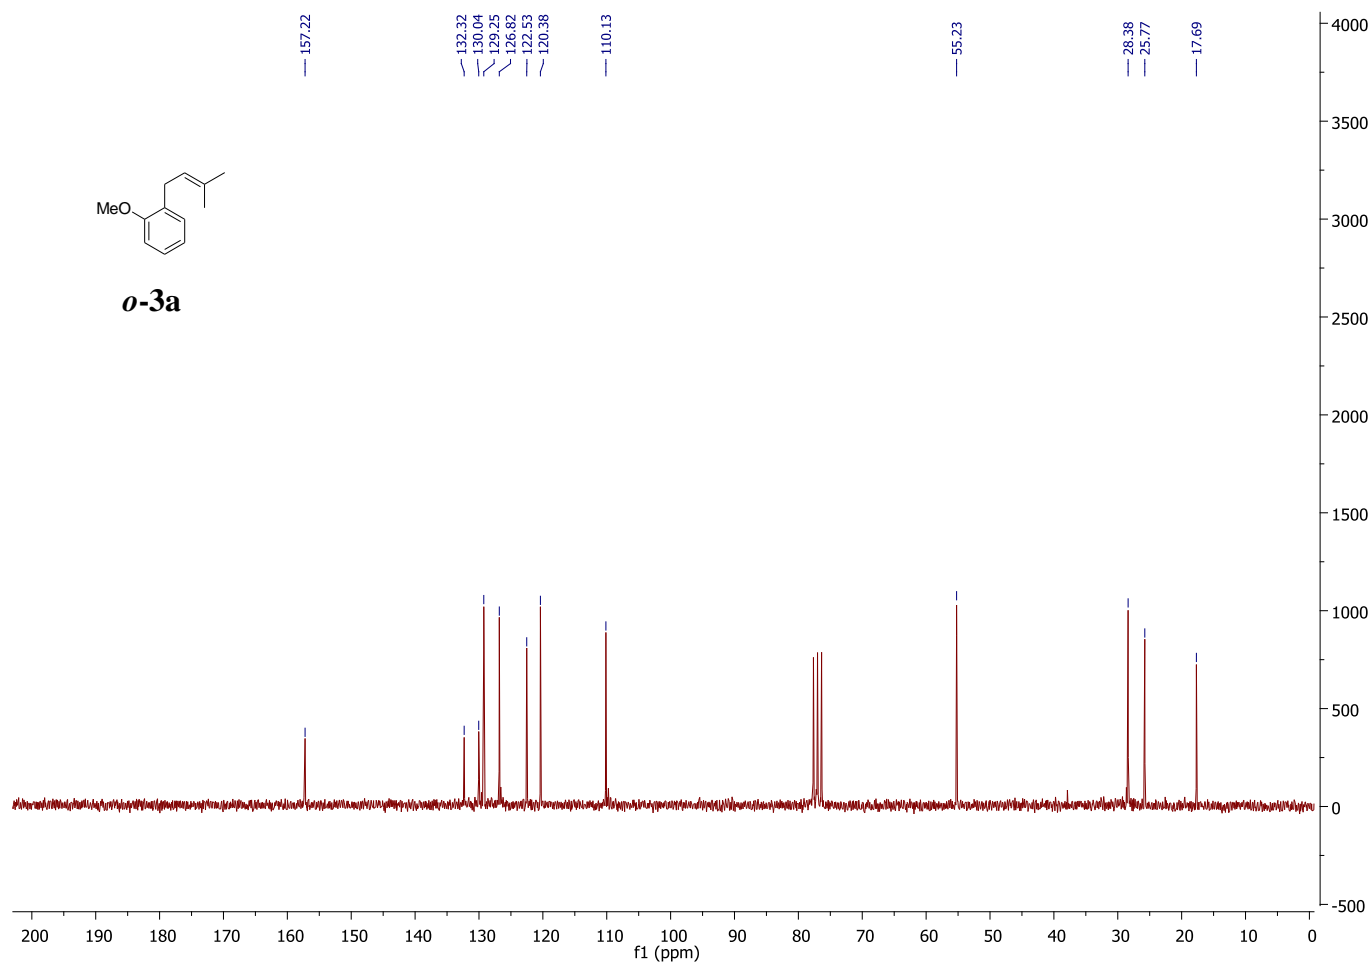

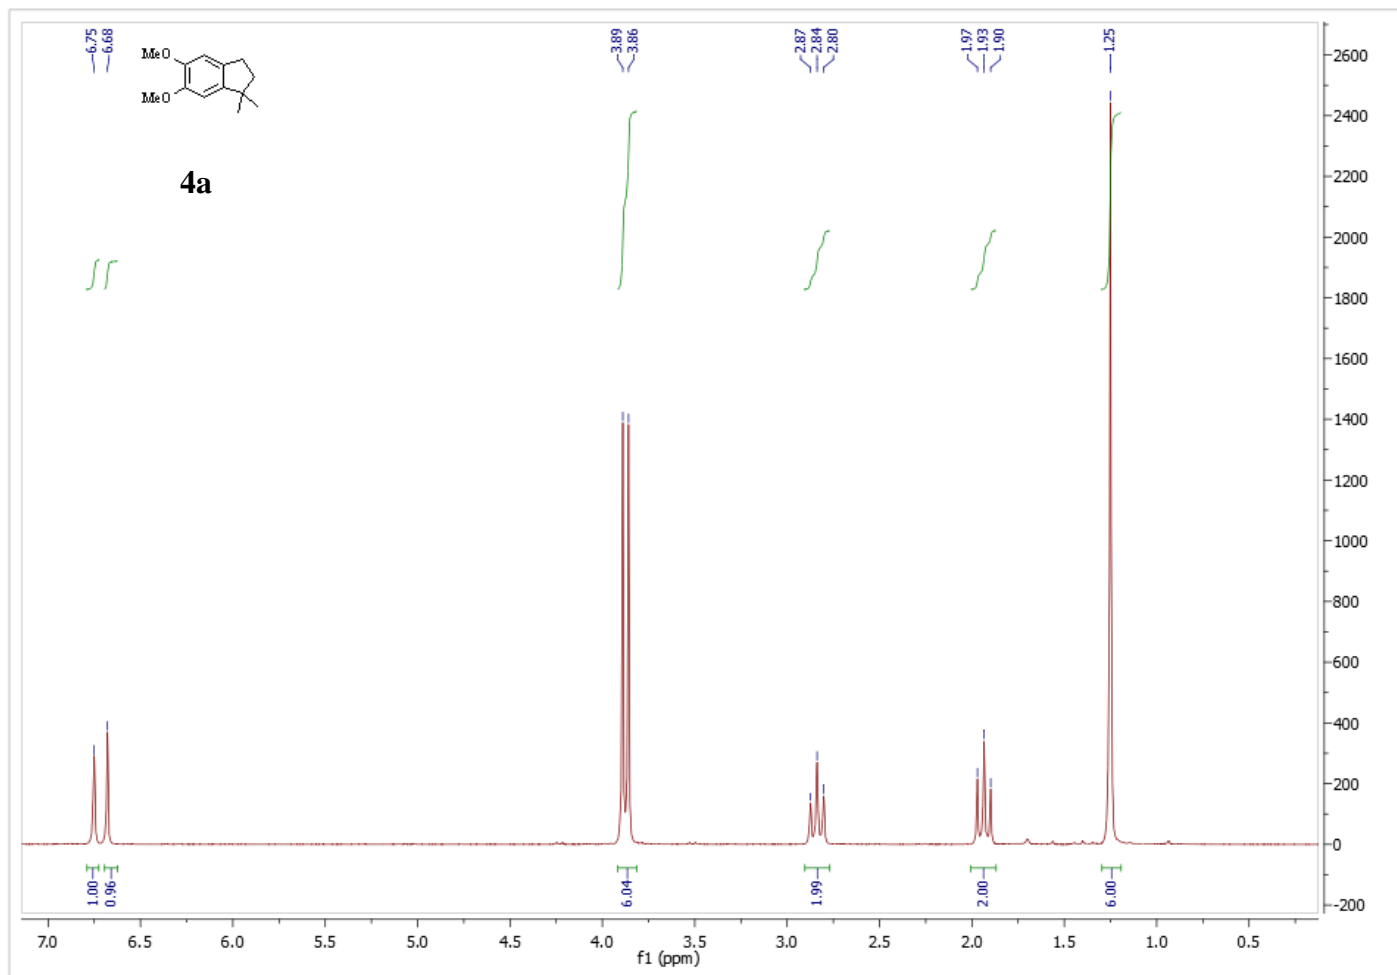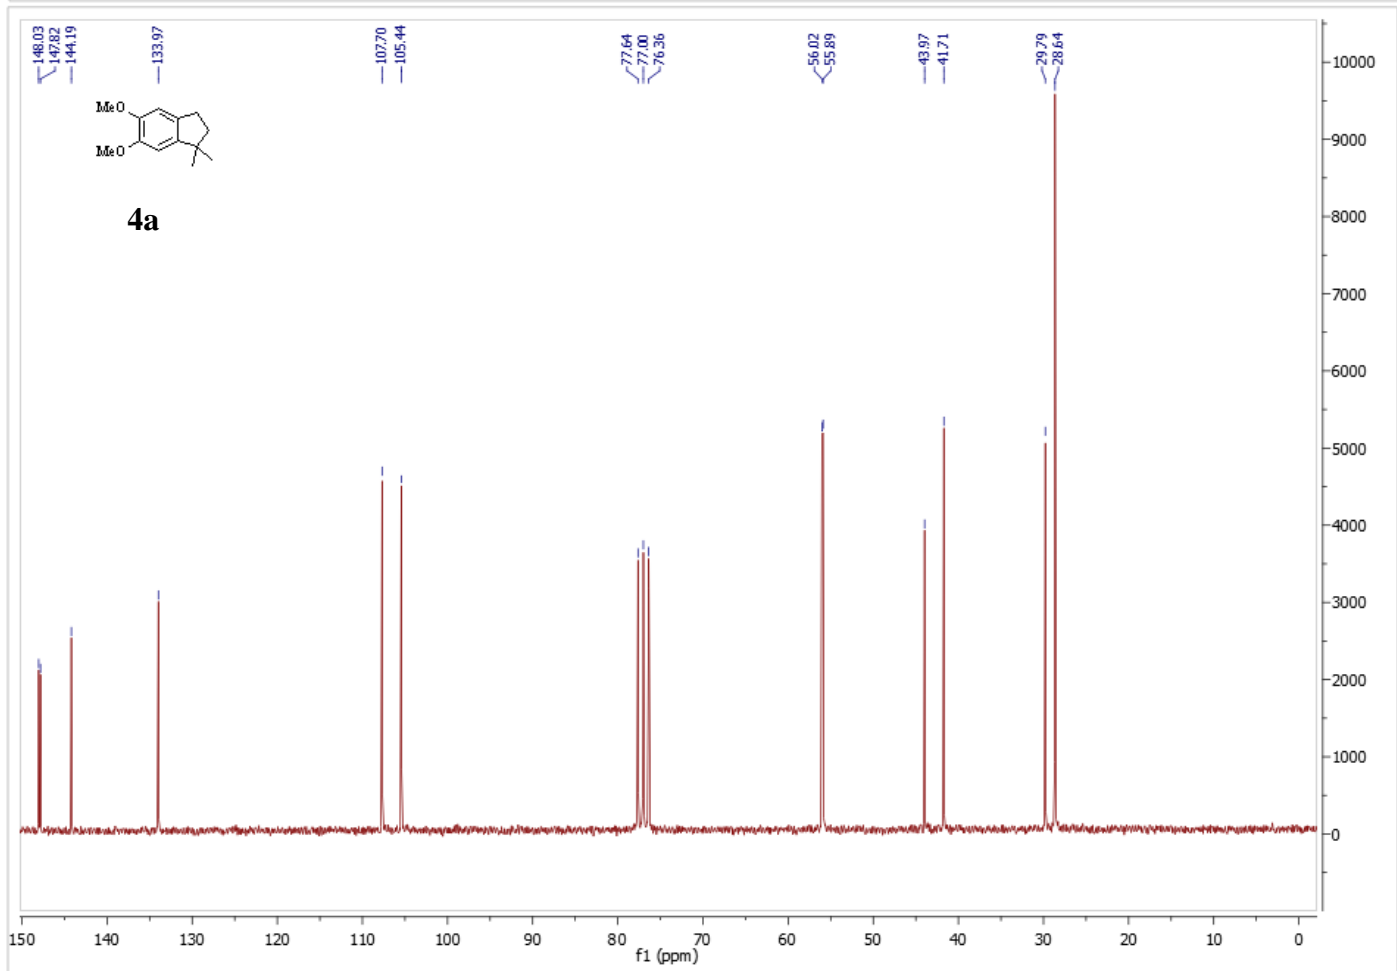

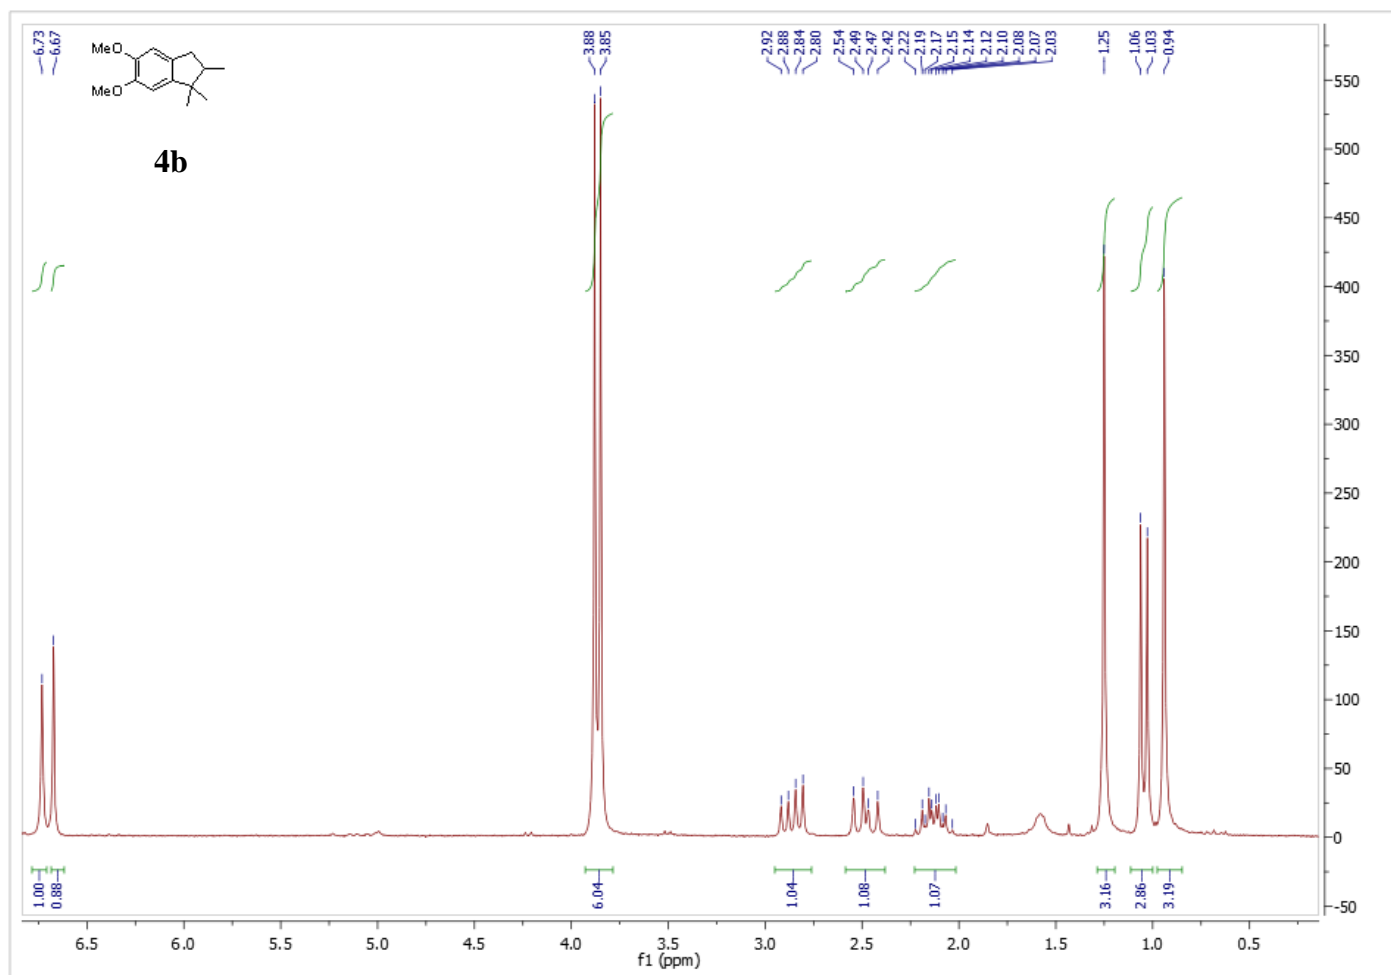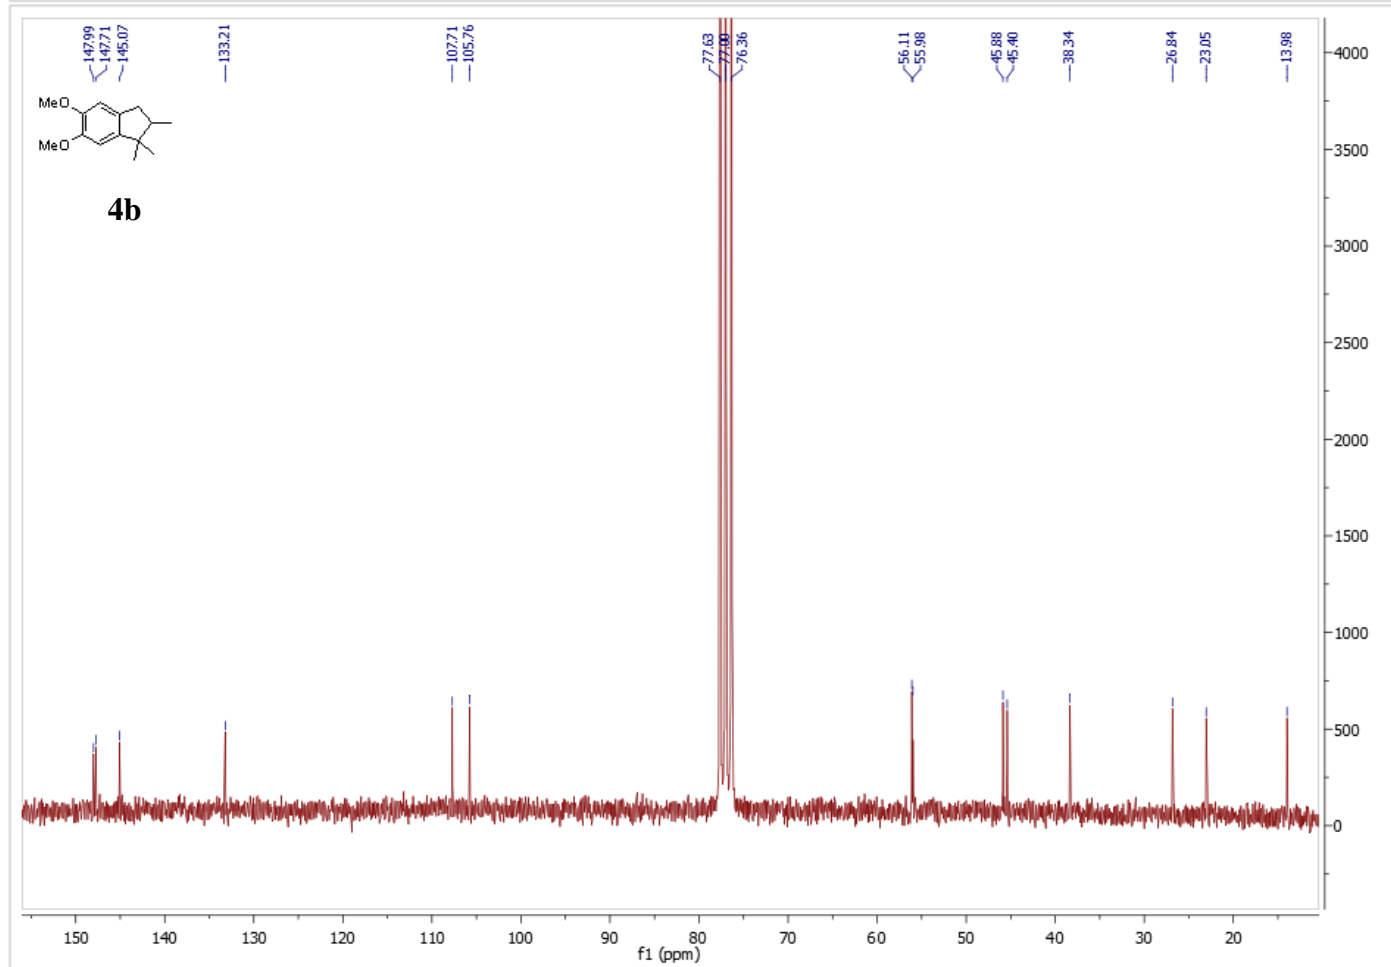

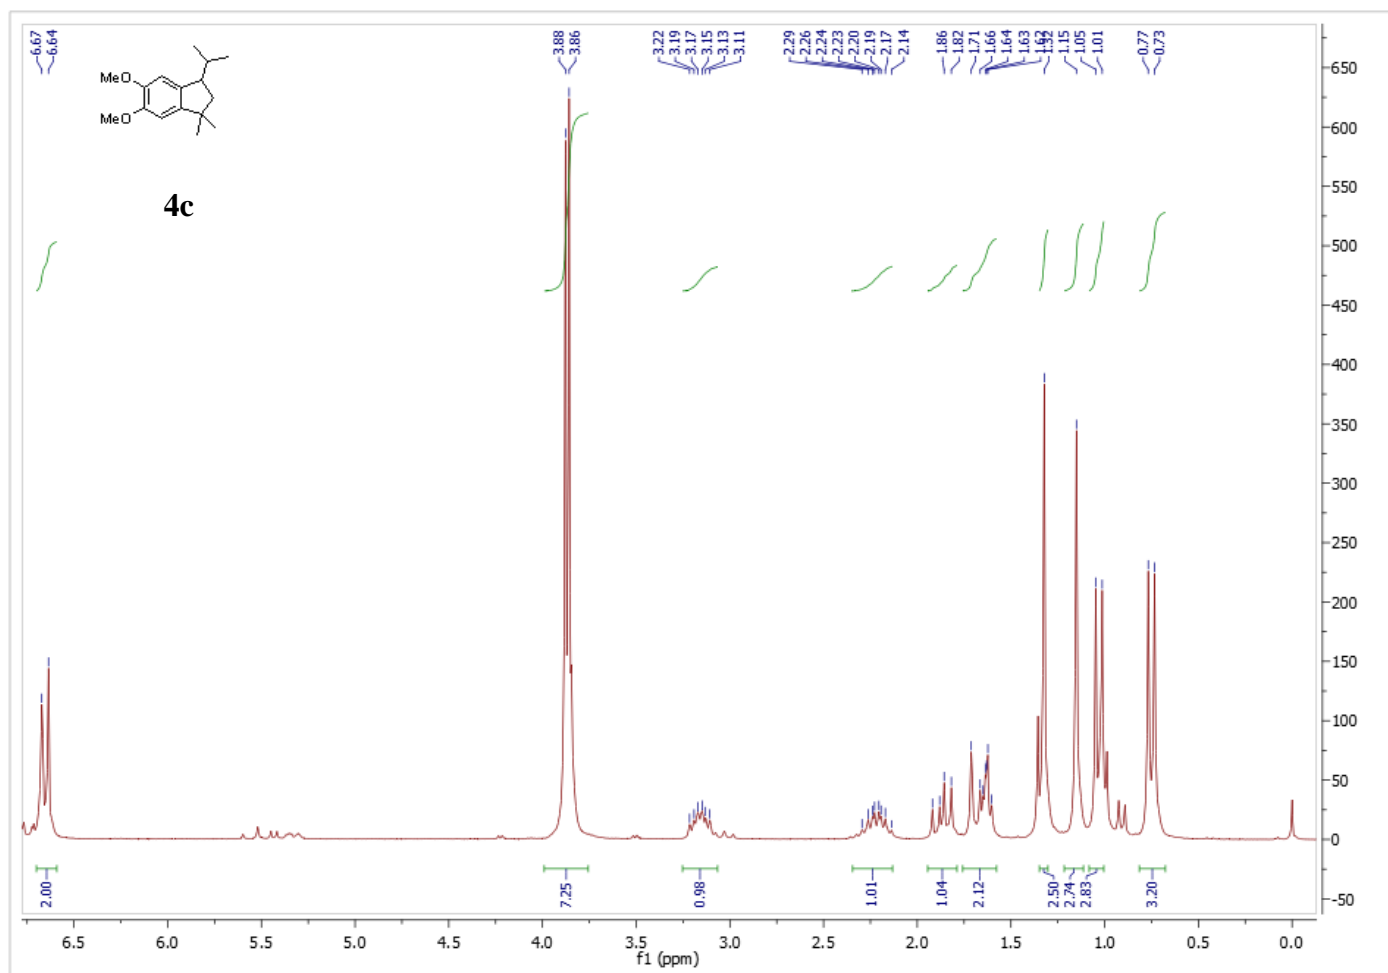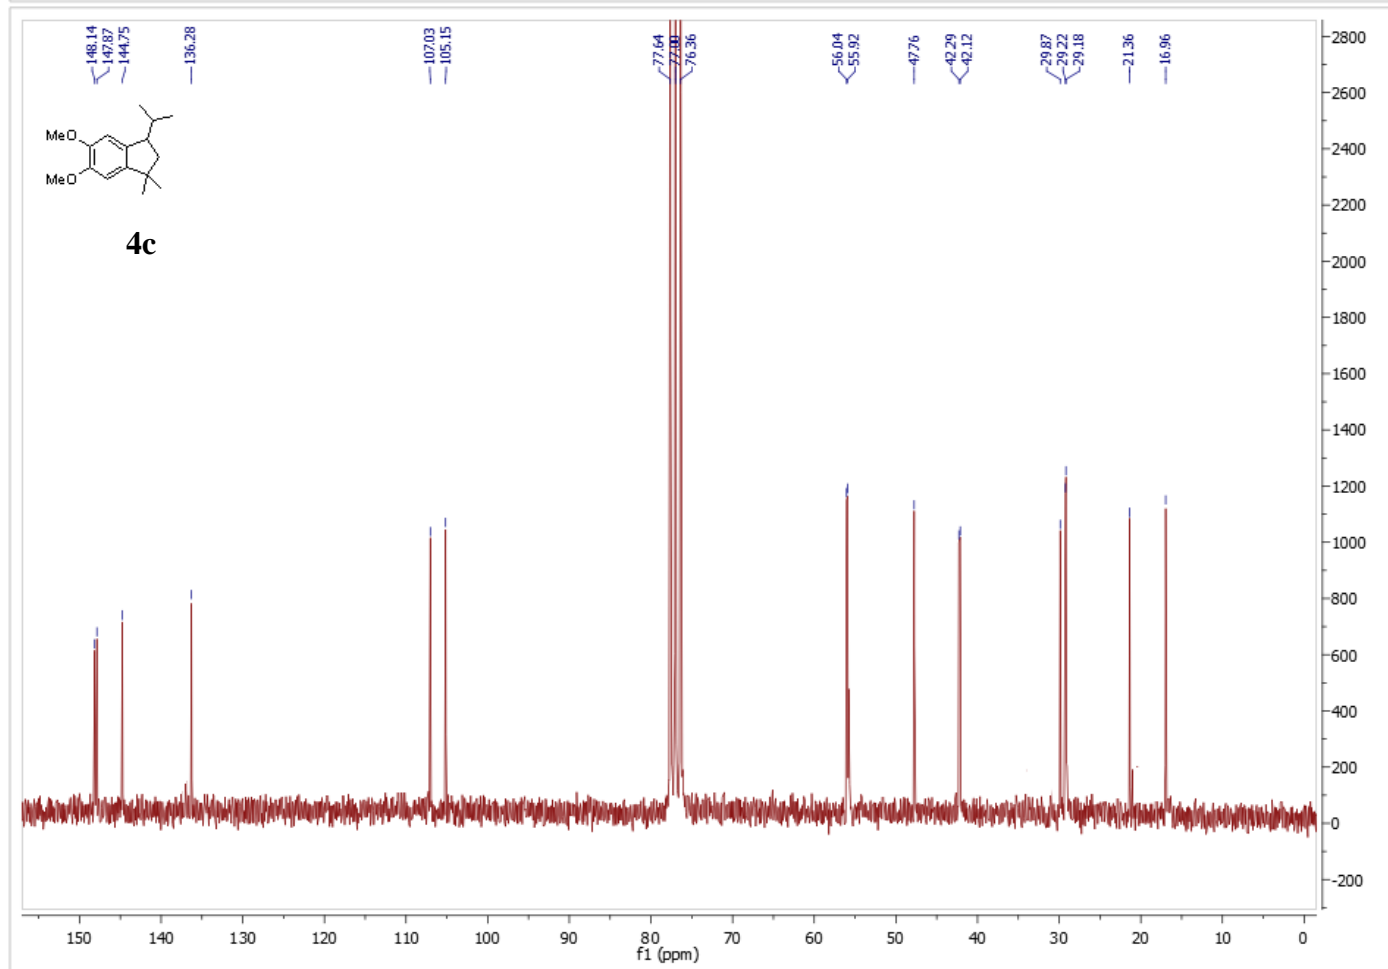

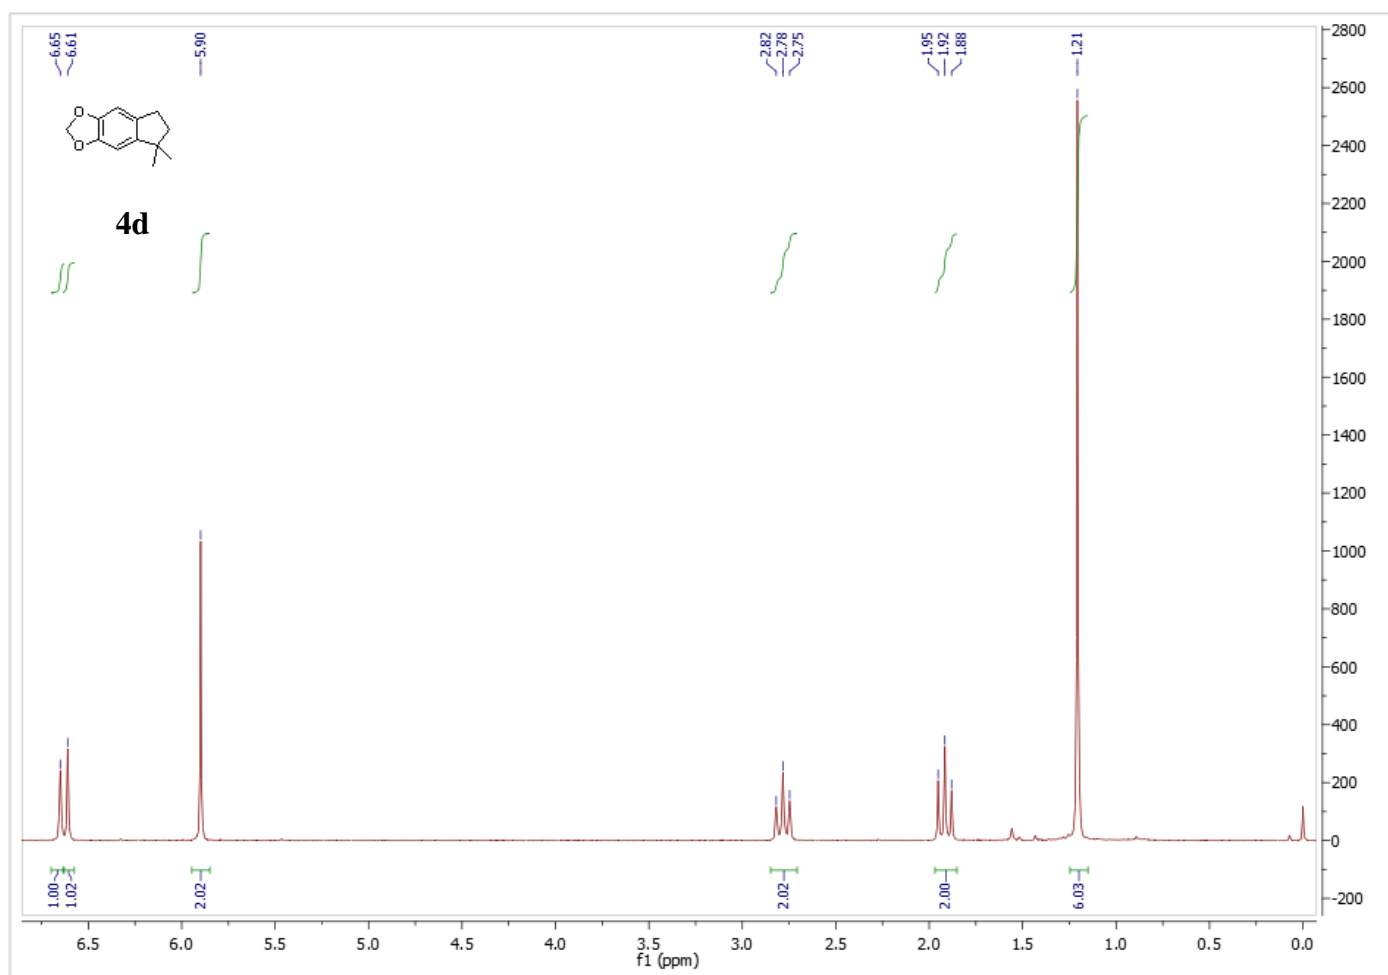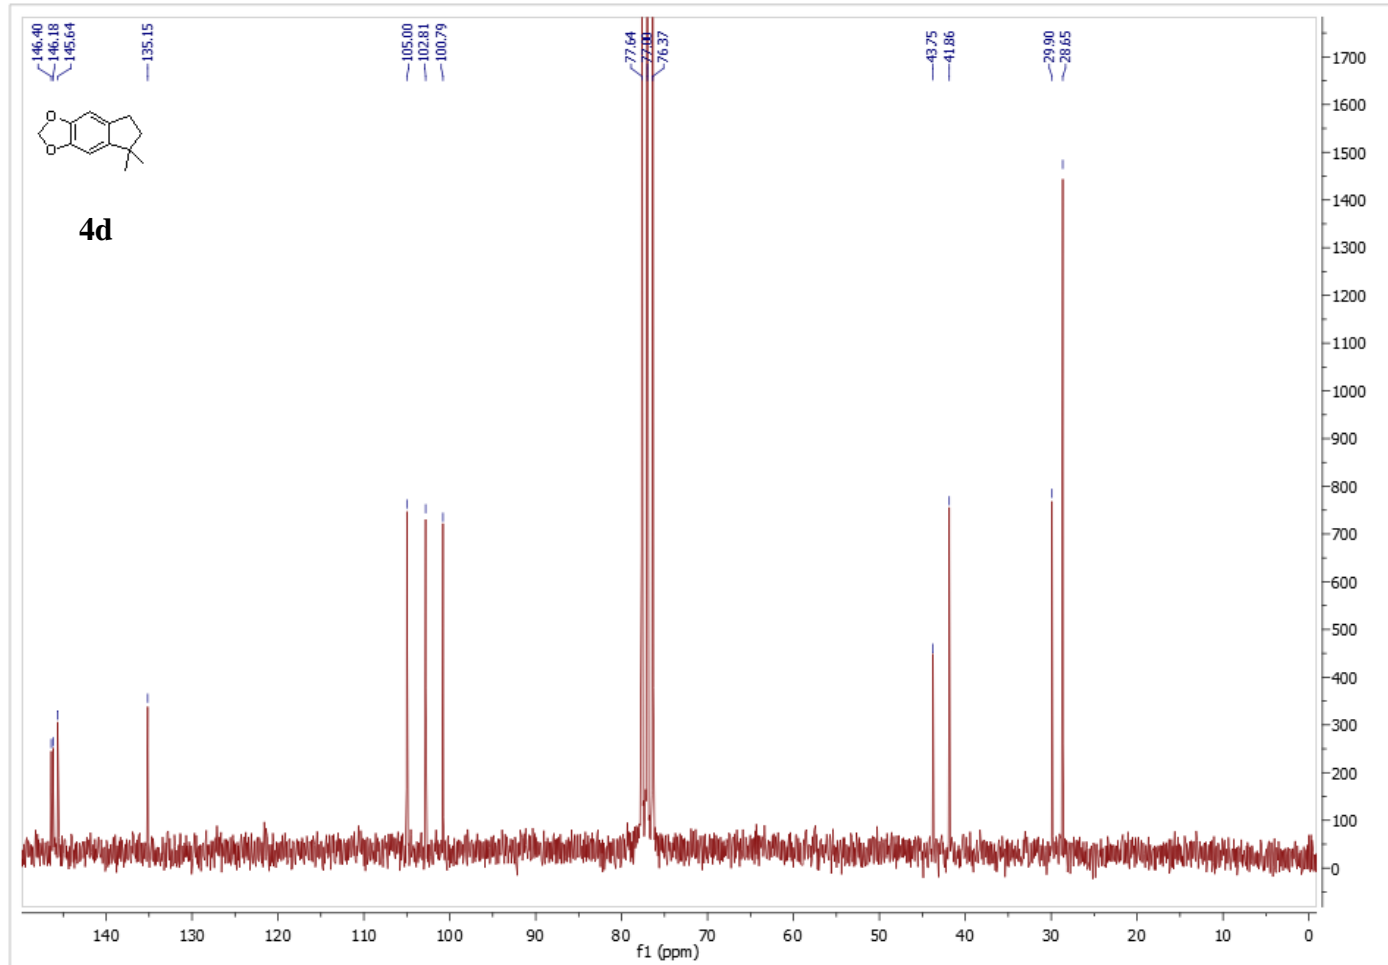

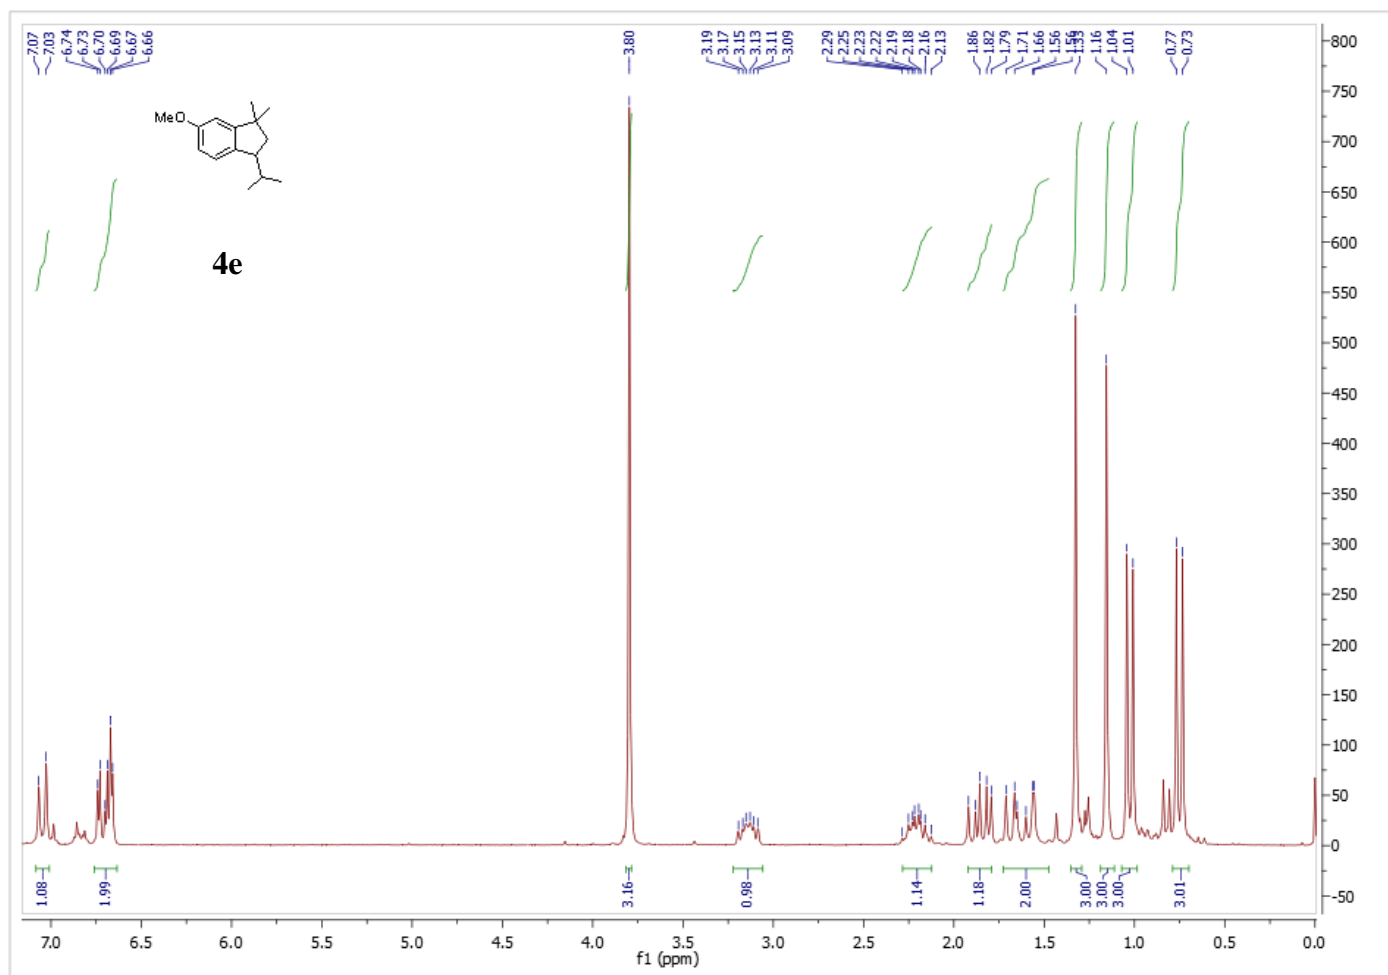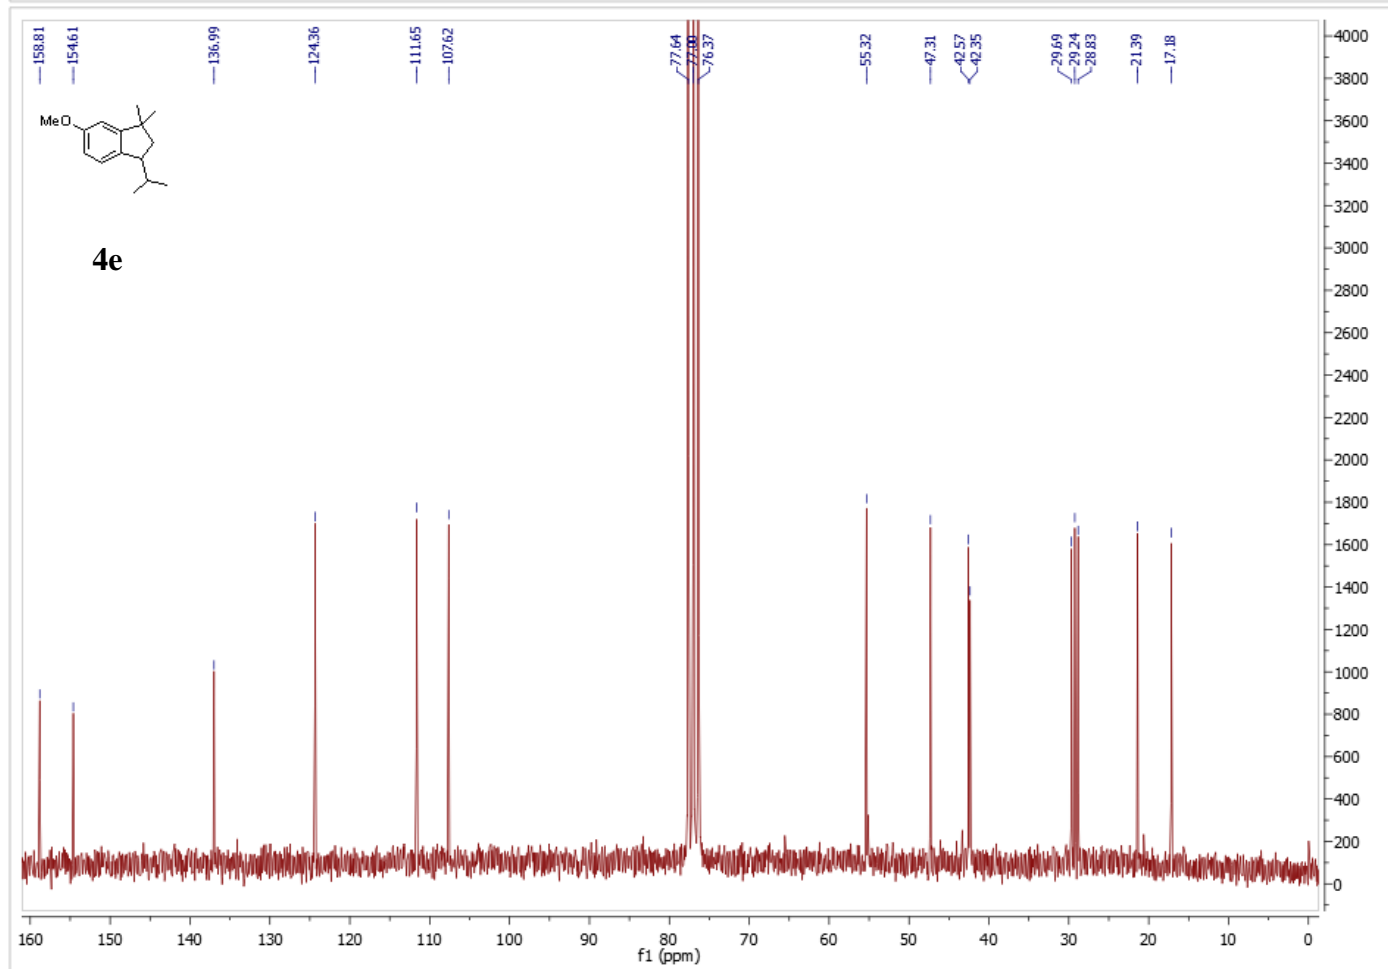

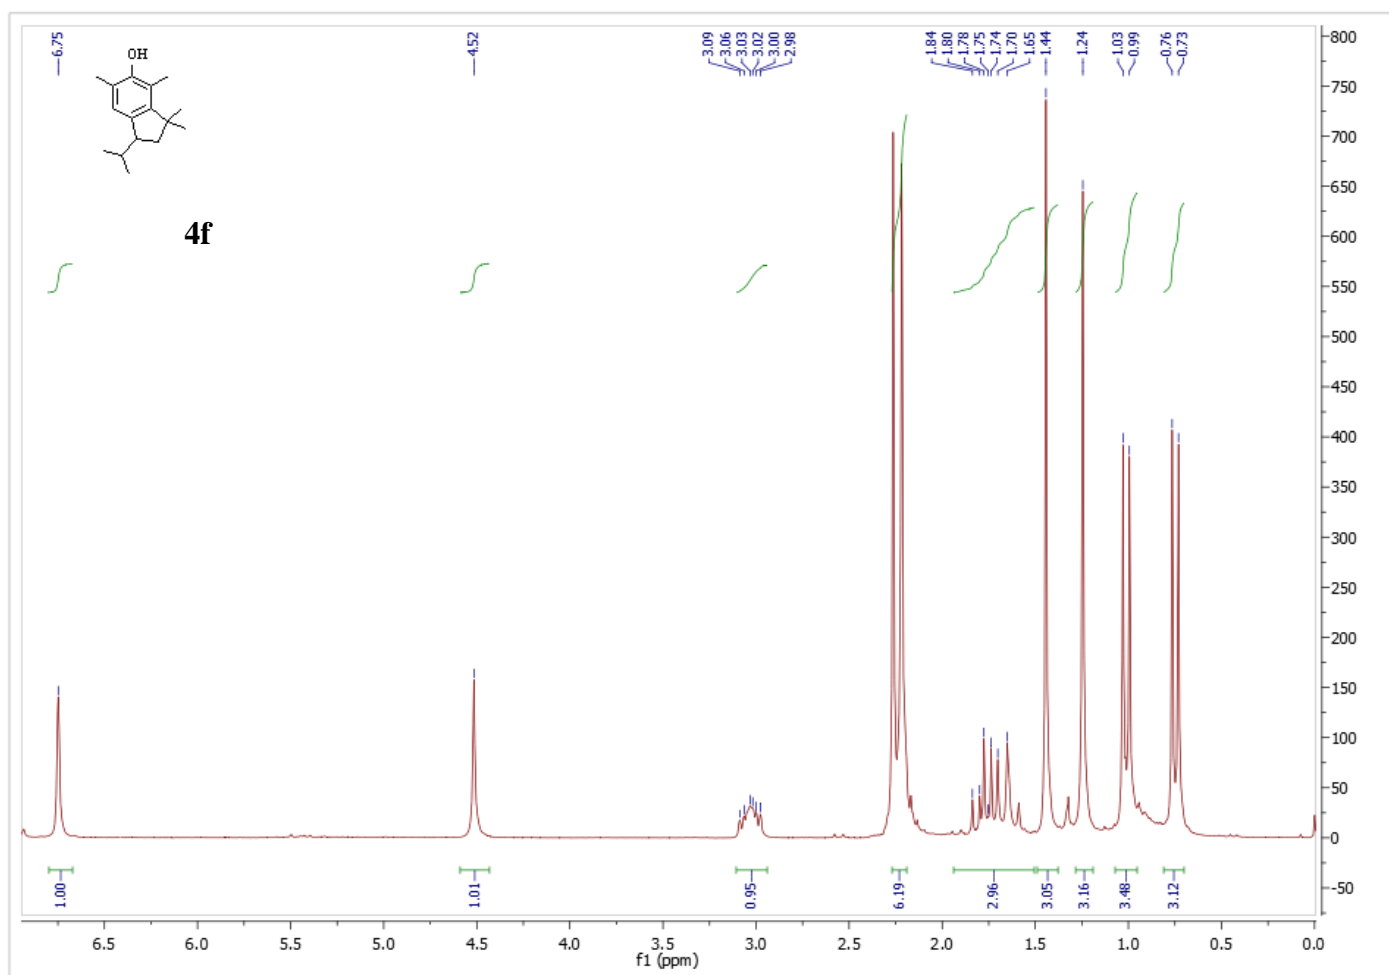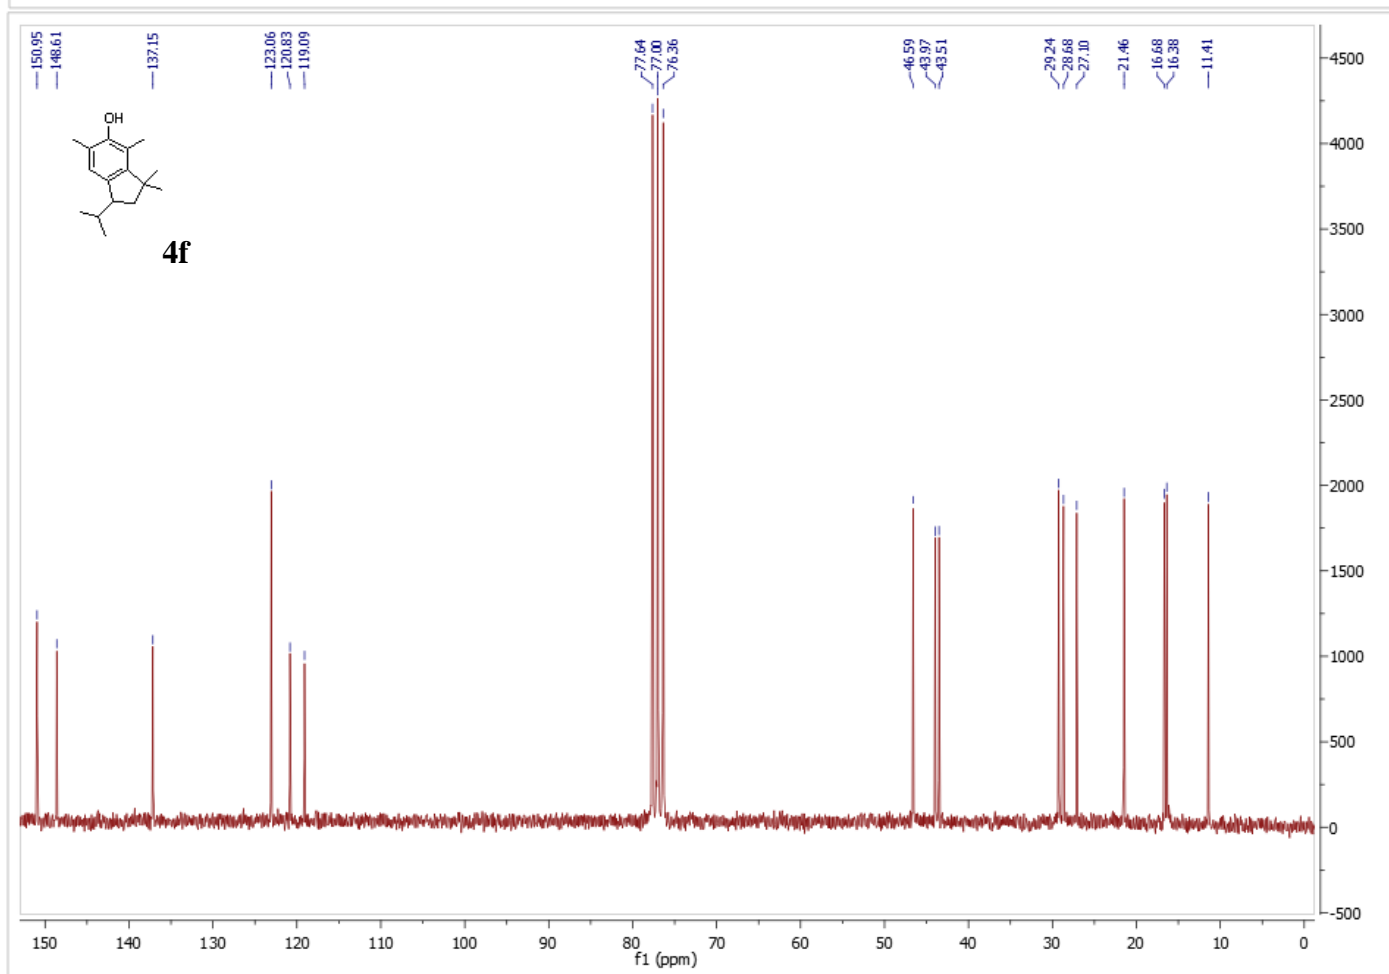

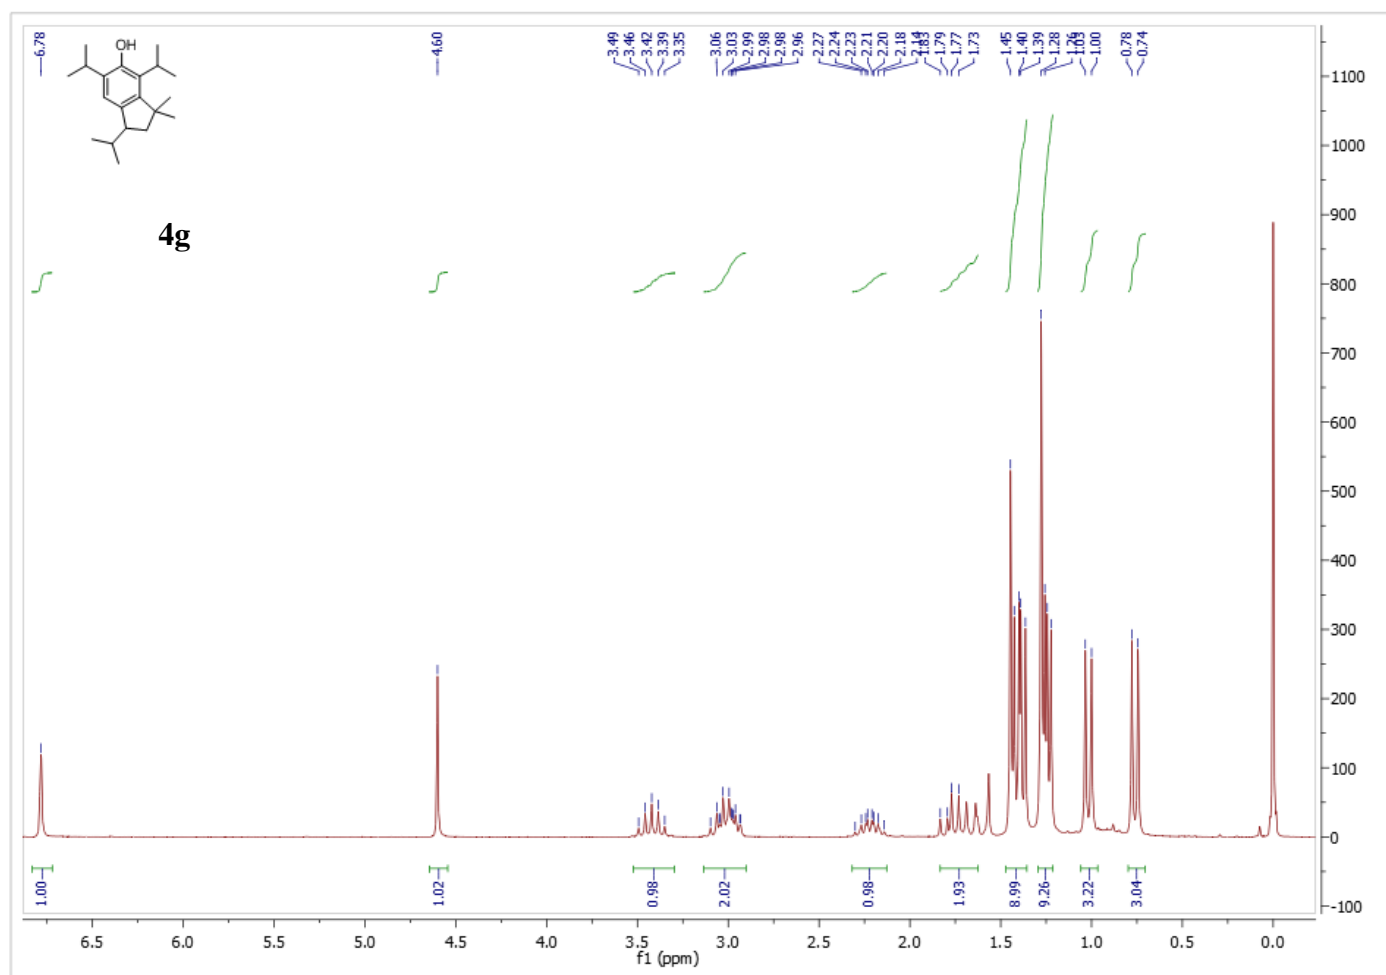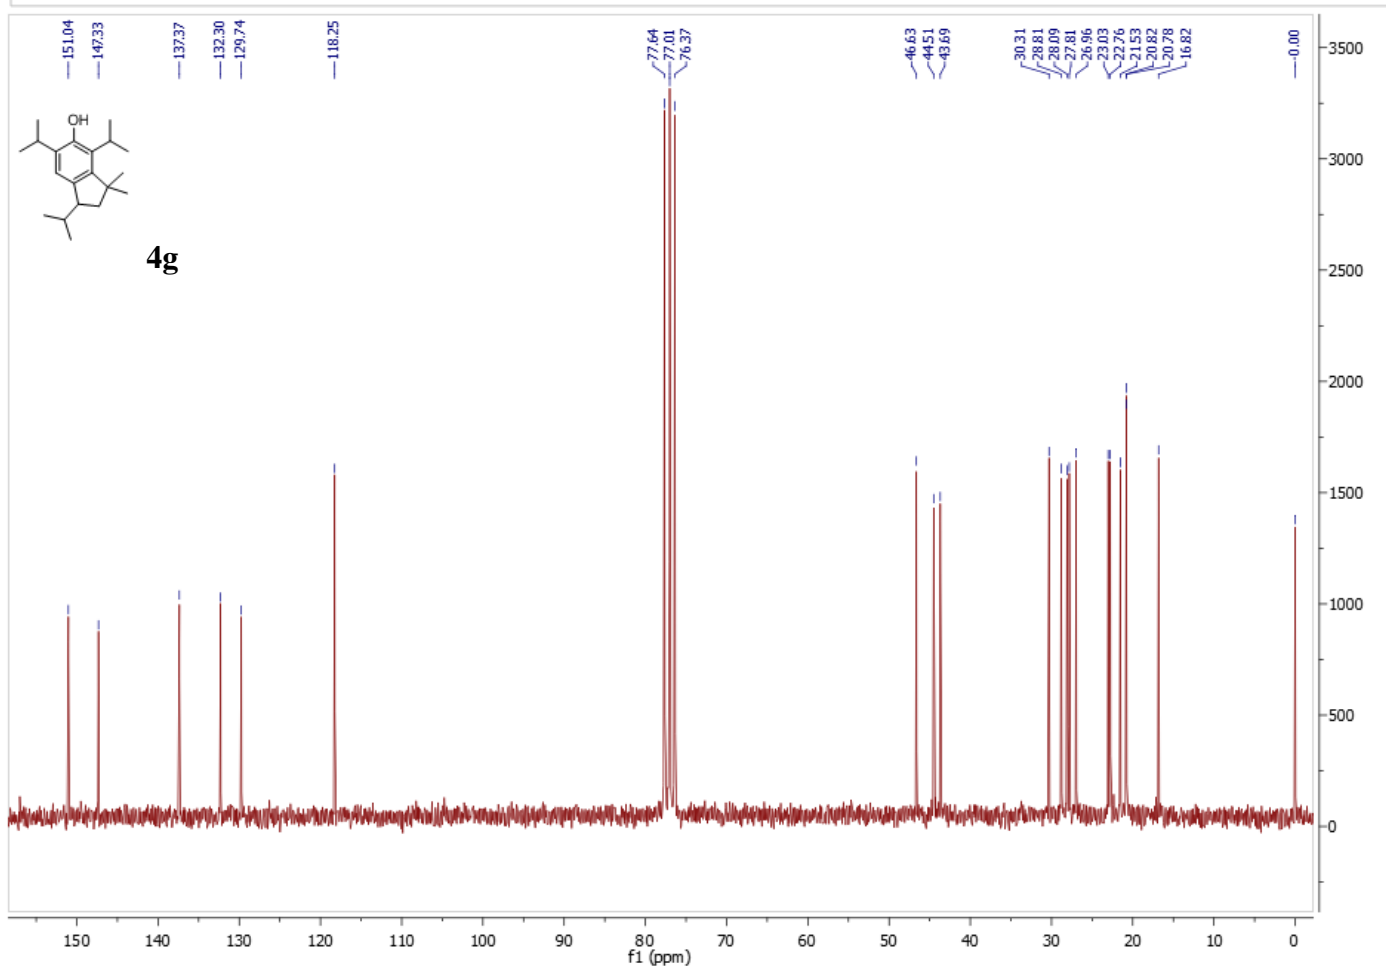

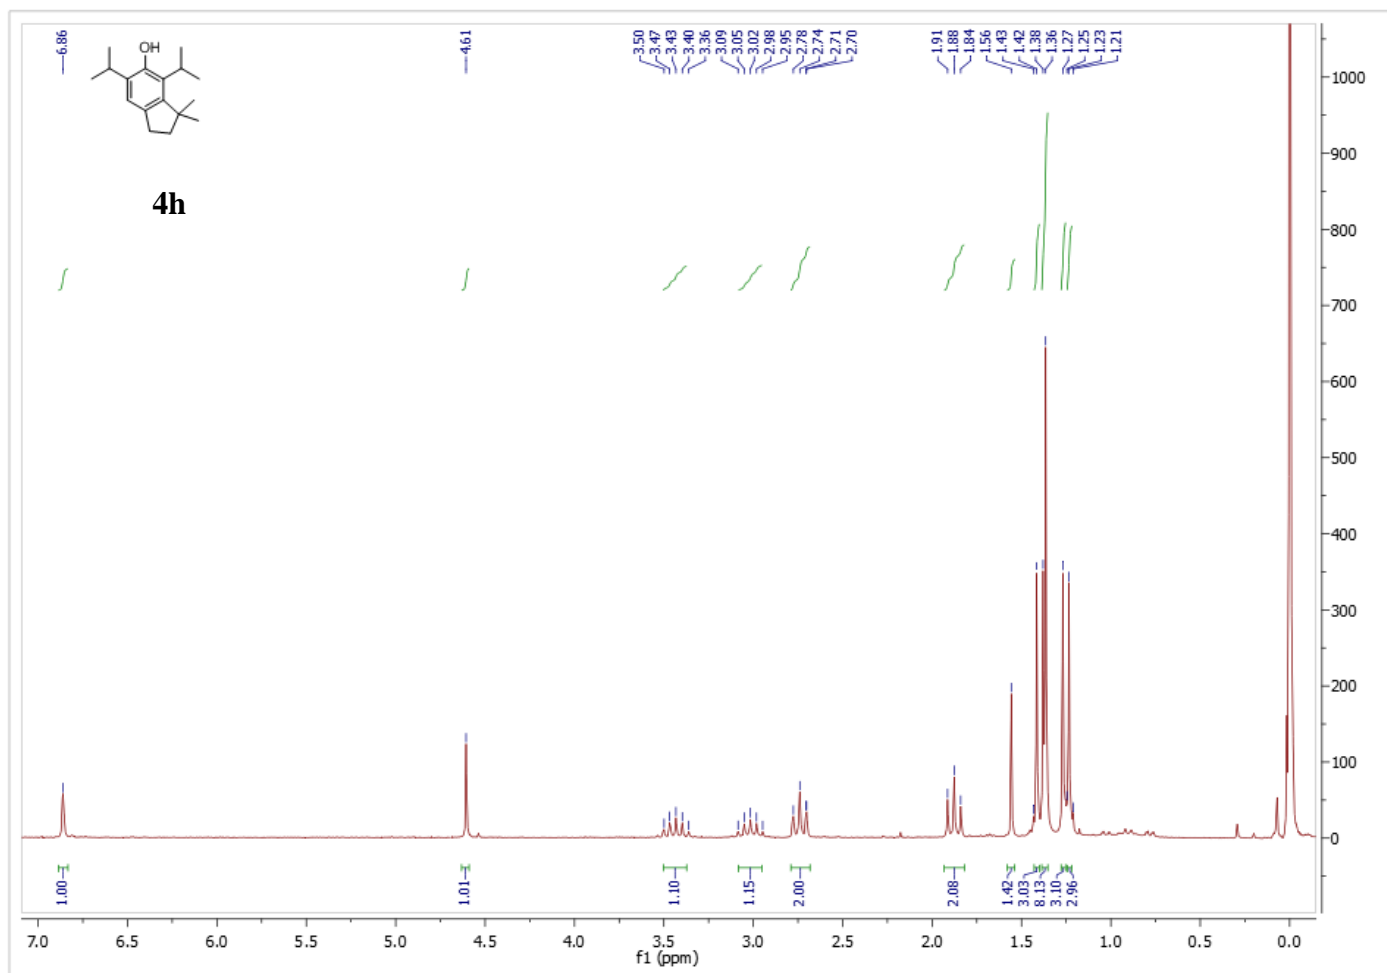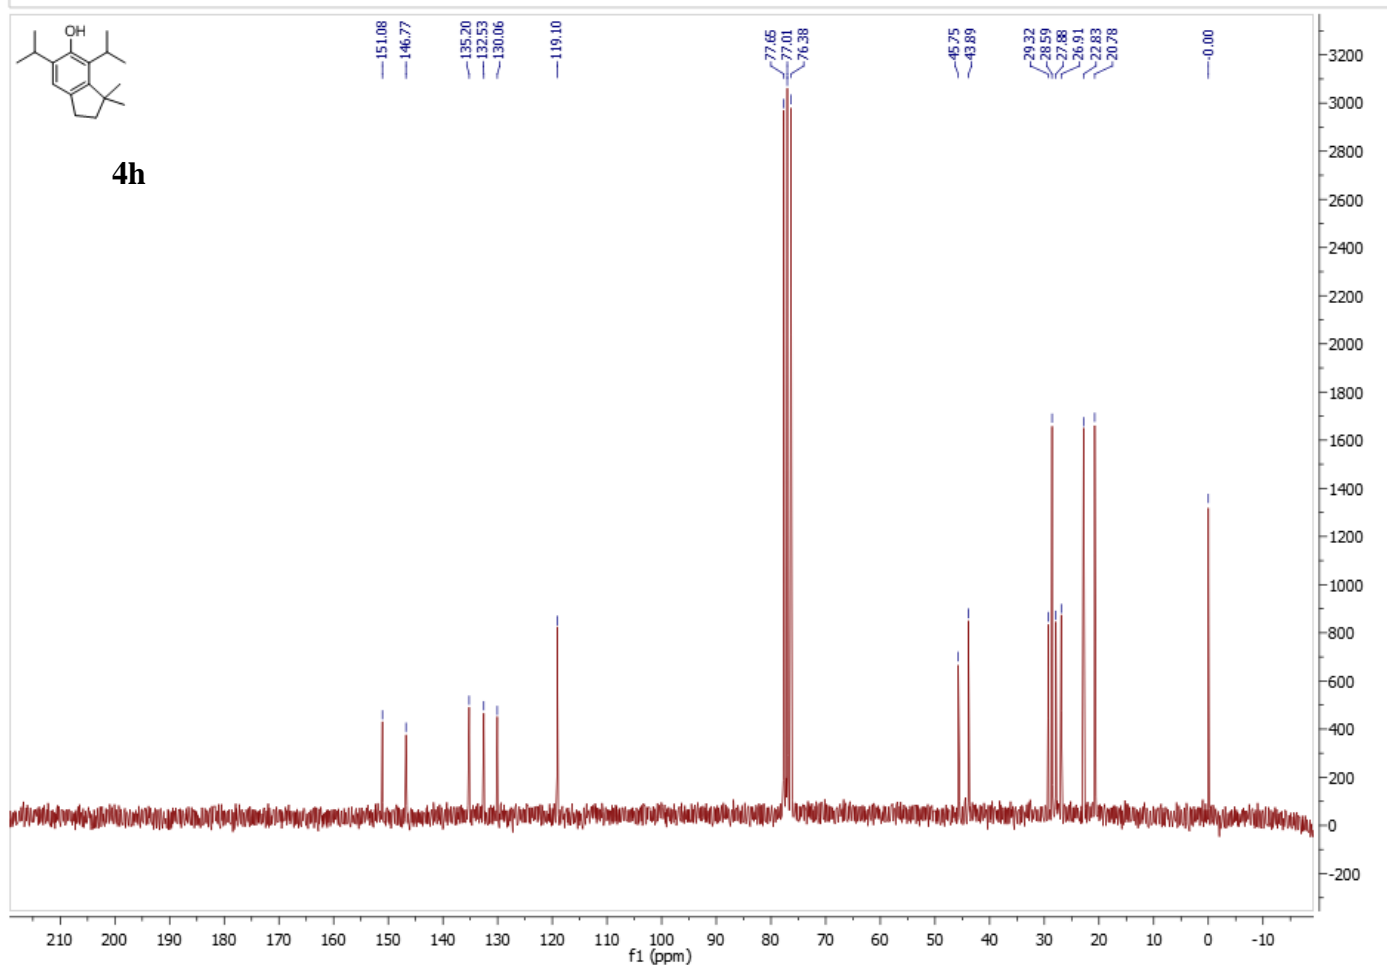

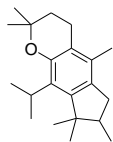

**4i**

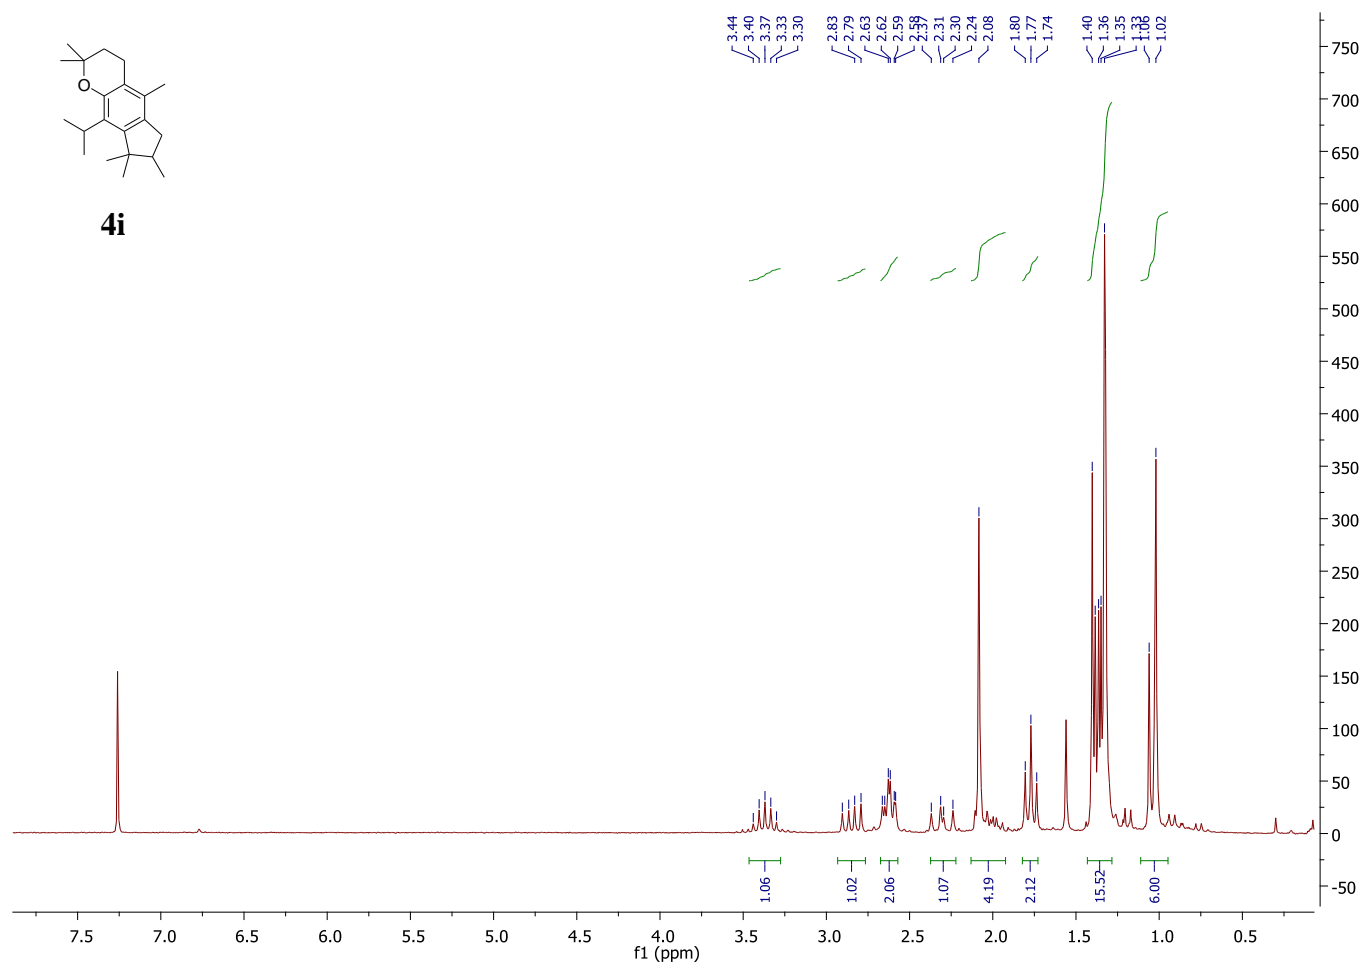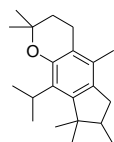

**4i**

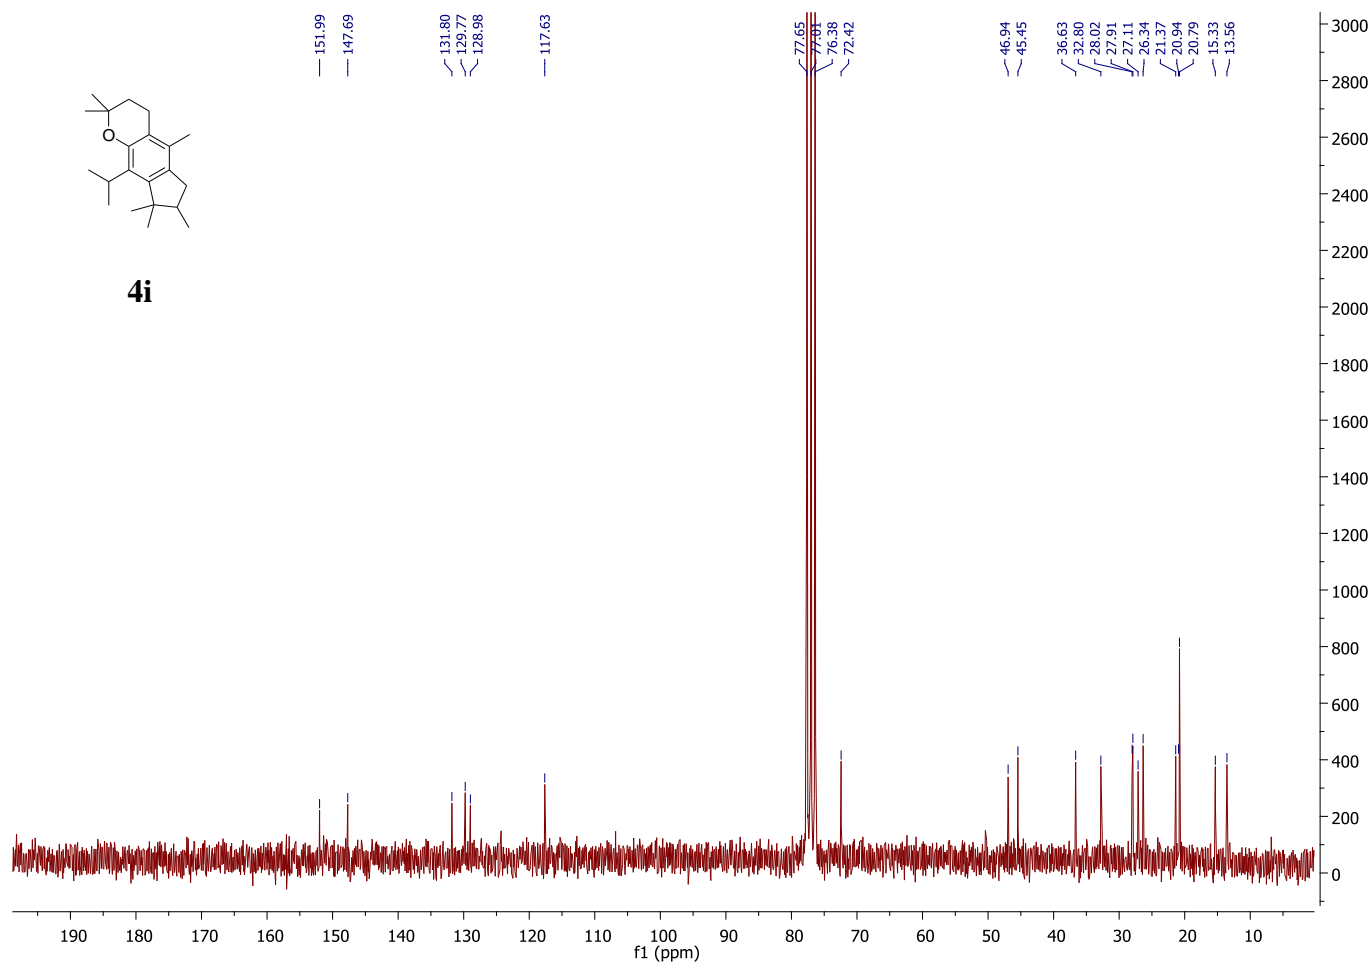

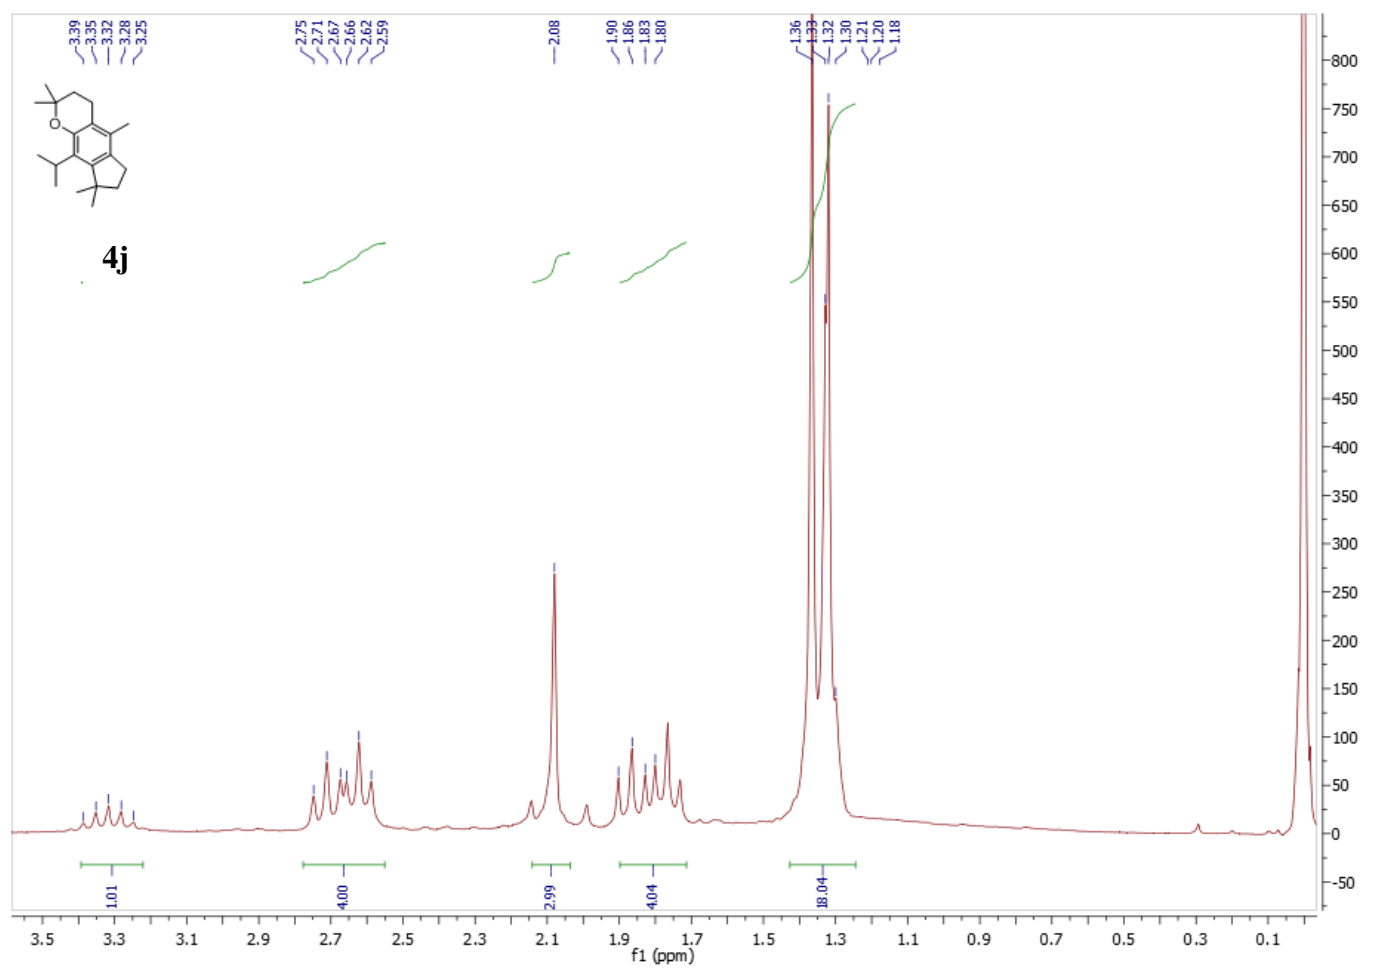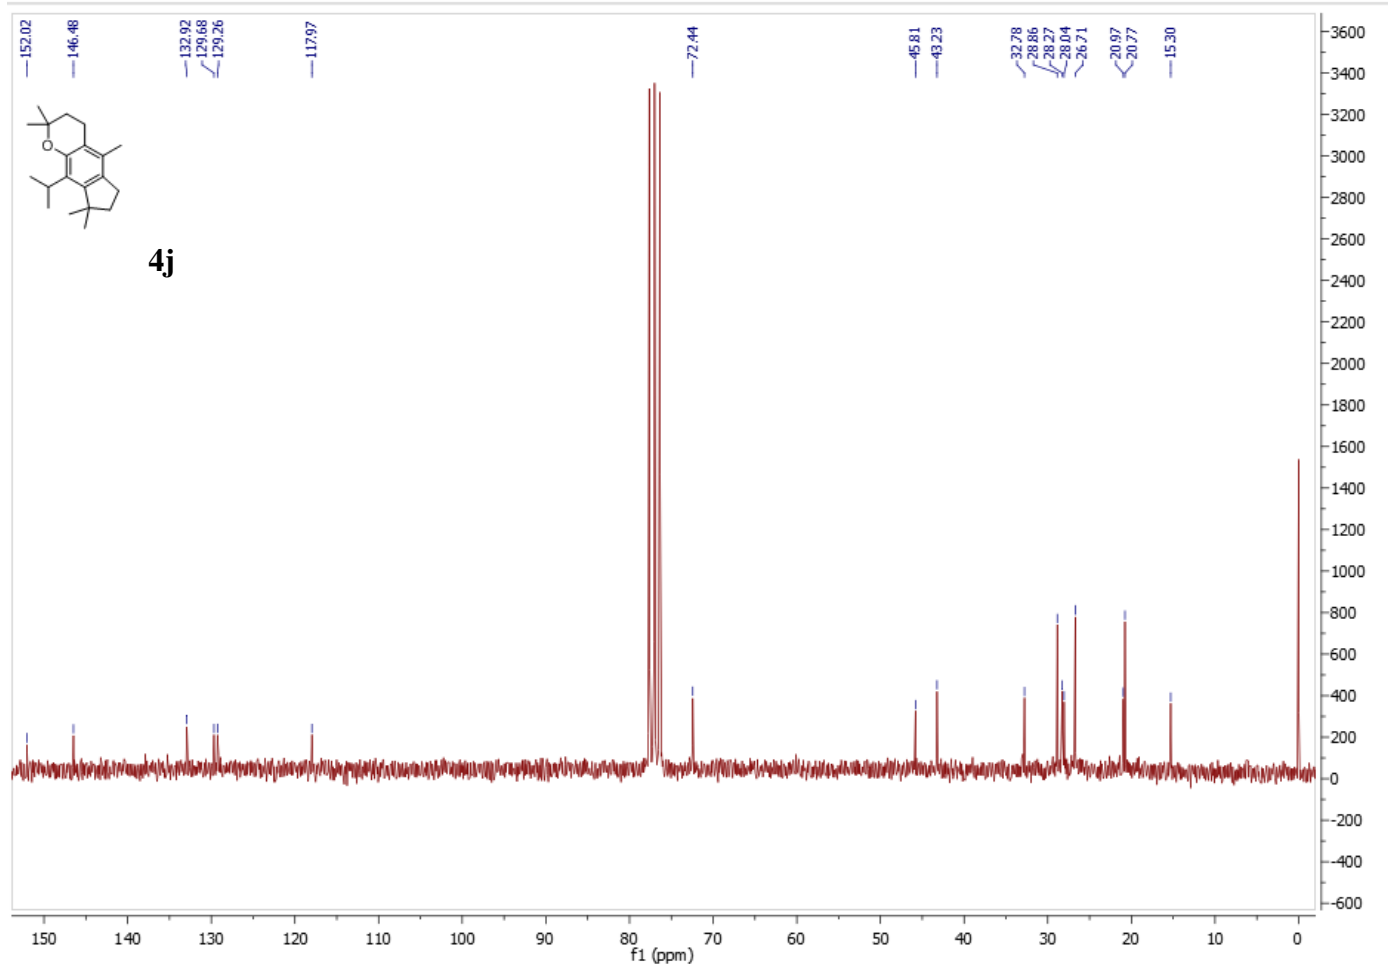

Supplement: c4qo00149d1.pdf [file c4qo00149d1.pdf]
